# Supplementary material
Source: PubMed Central journal article supplement (PMC3536172)
Supplement: JB.01977-12_zjb999092342so1.pdf [file JB.01977-12_zjb999092342so1.pdf]

## Reference regulons

### MreC

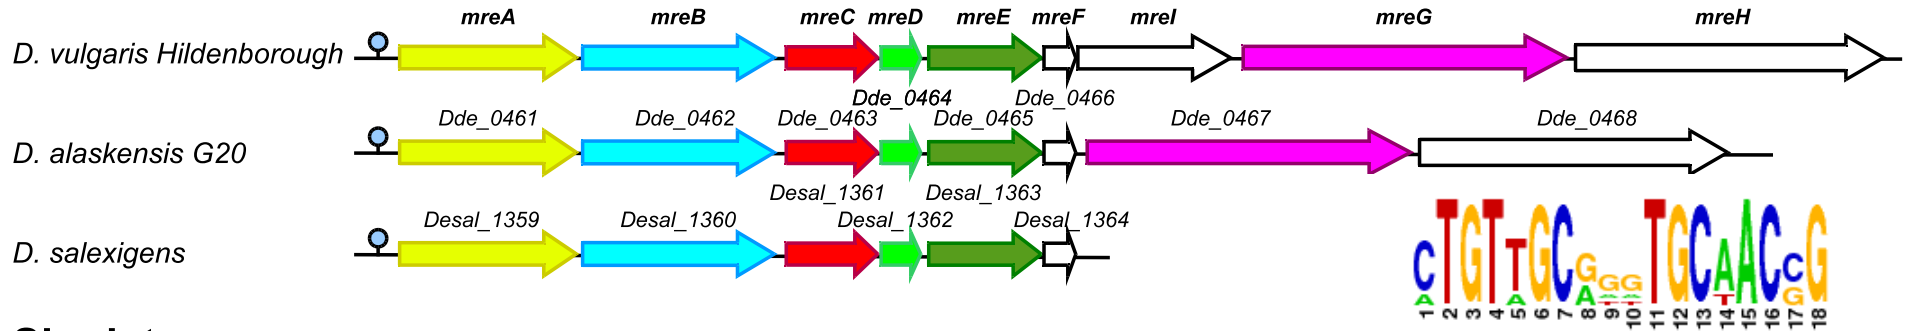

## Singletons

### Dde\_1200, Desal\_0411

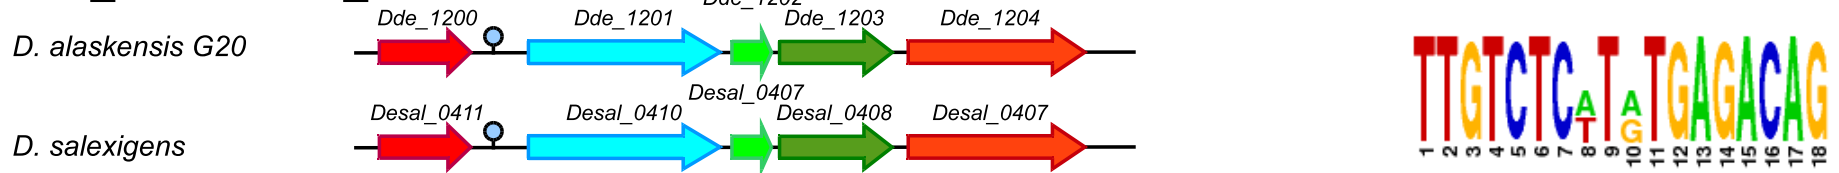

### DVU3111

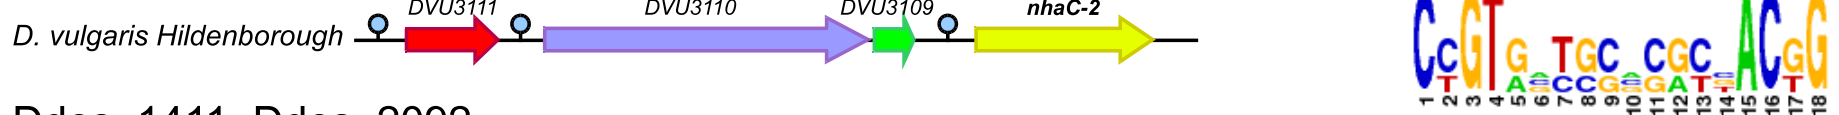

### Ddes\_1411, Ddes\_2092

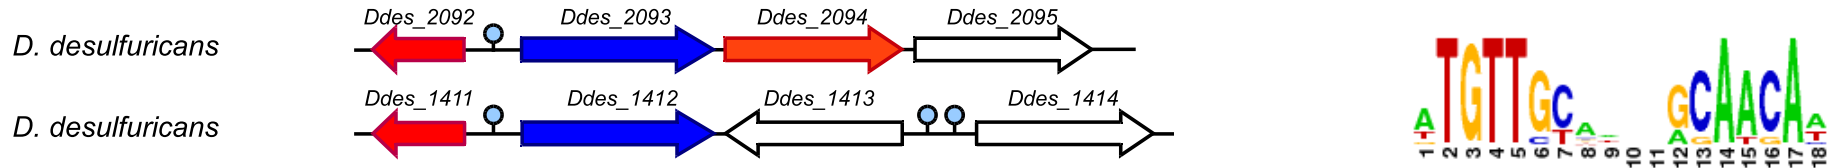

## Gene functions

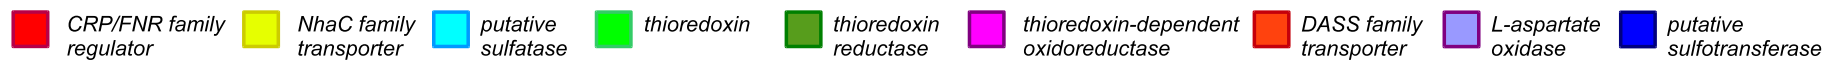

FIG S1 Genomic organization of MreC-like regulons.

## Reference regulons

### HcpR

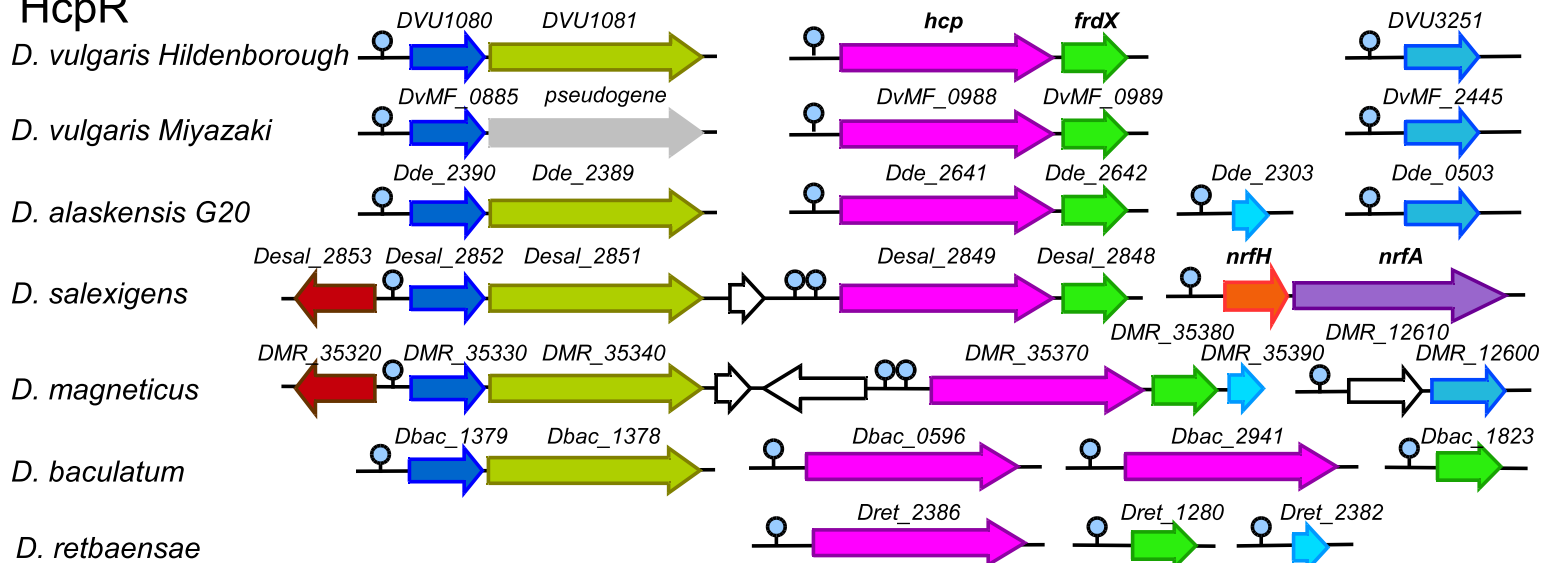

### Desal\_2066

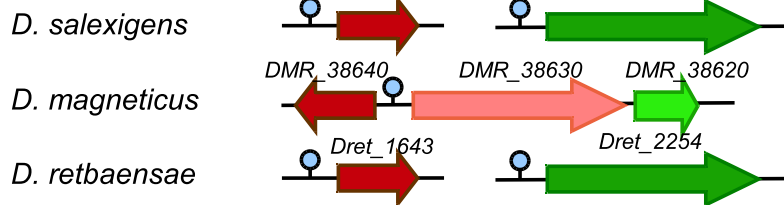

### Singletons

#### Ddes\_0528, DESPIG\_03026

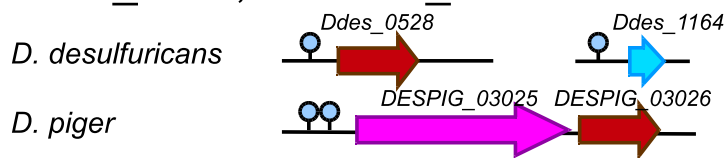

#### Ddes\_1827

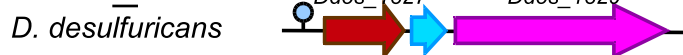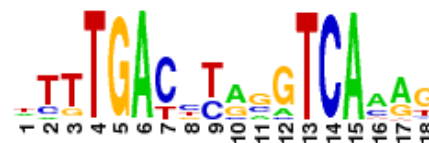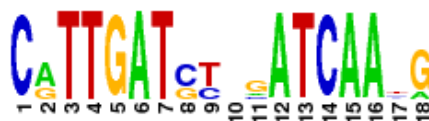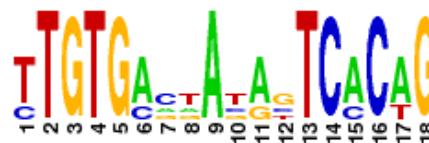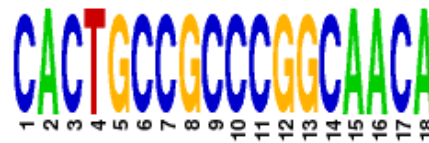

## Gene functions

- CRP/FNR family regulator
- oxidoreductase
- polyferredoxin
- hybrid cluster protein
- ferredoxin
- HPP family protein
- cupin 2 barrel protein
- cytochrome c
- nitrite reductase
- Fe-S-cluster containing protein
- pyridine nucleotide-disulphide oxidoreductase

FIG S2 Genomic organization of HcpR-like regulons.

# Reference regulons

## CooA

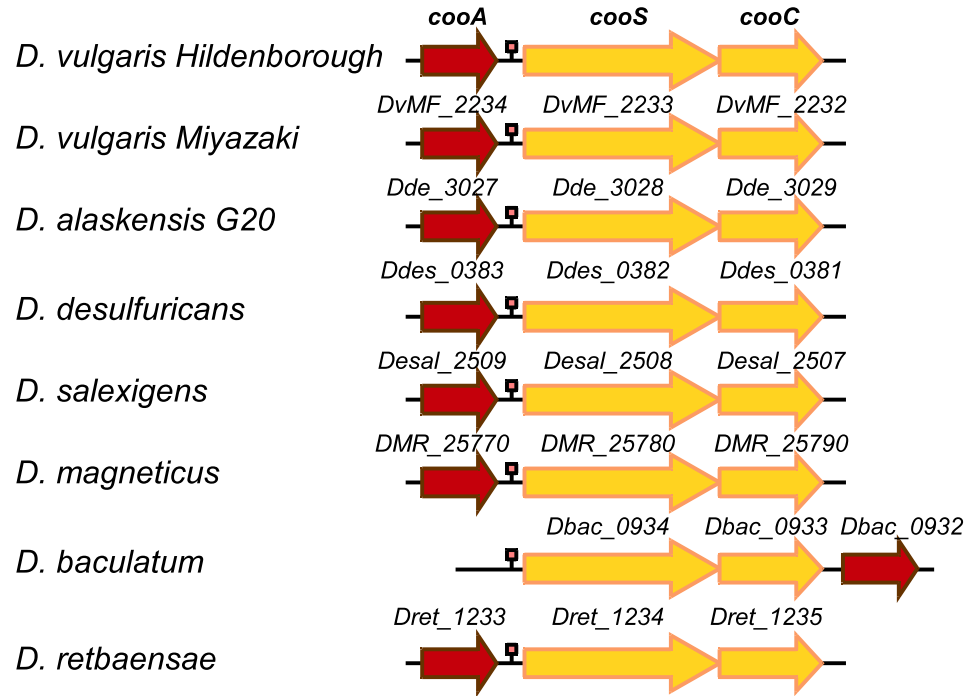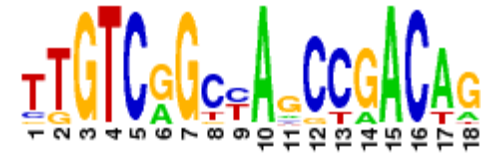

## DvMF\_1708

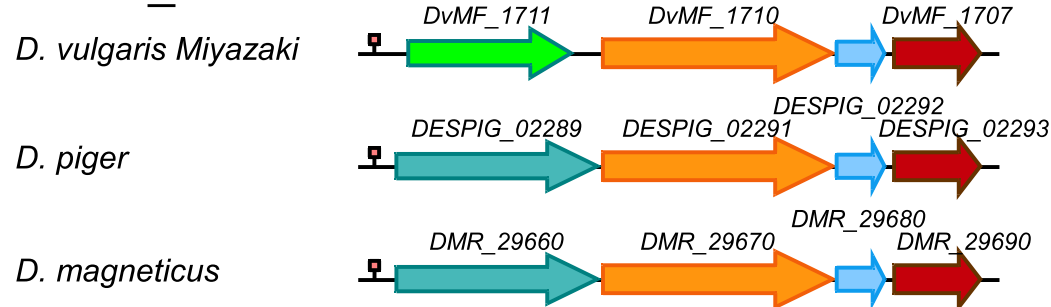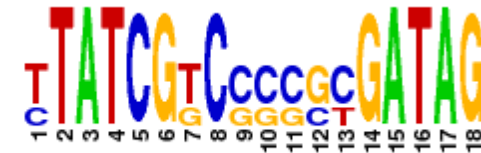

## Gene functions

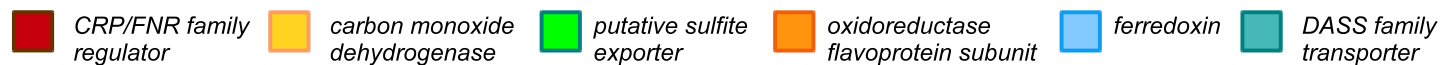

FIG S3 Genomic organization of CooA-like regulons.

# SahR

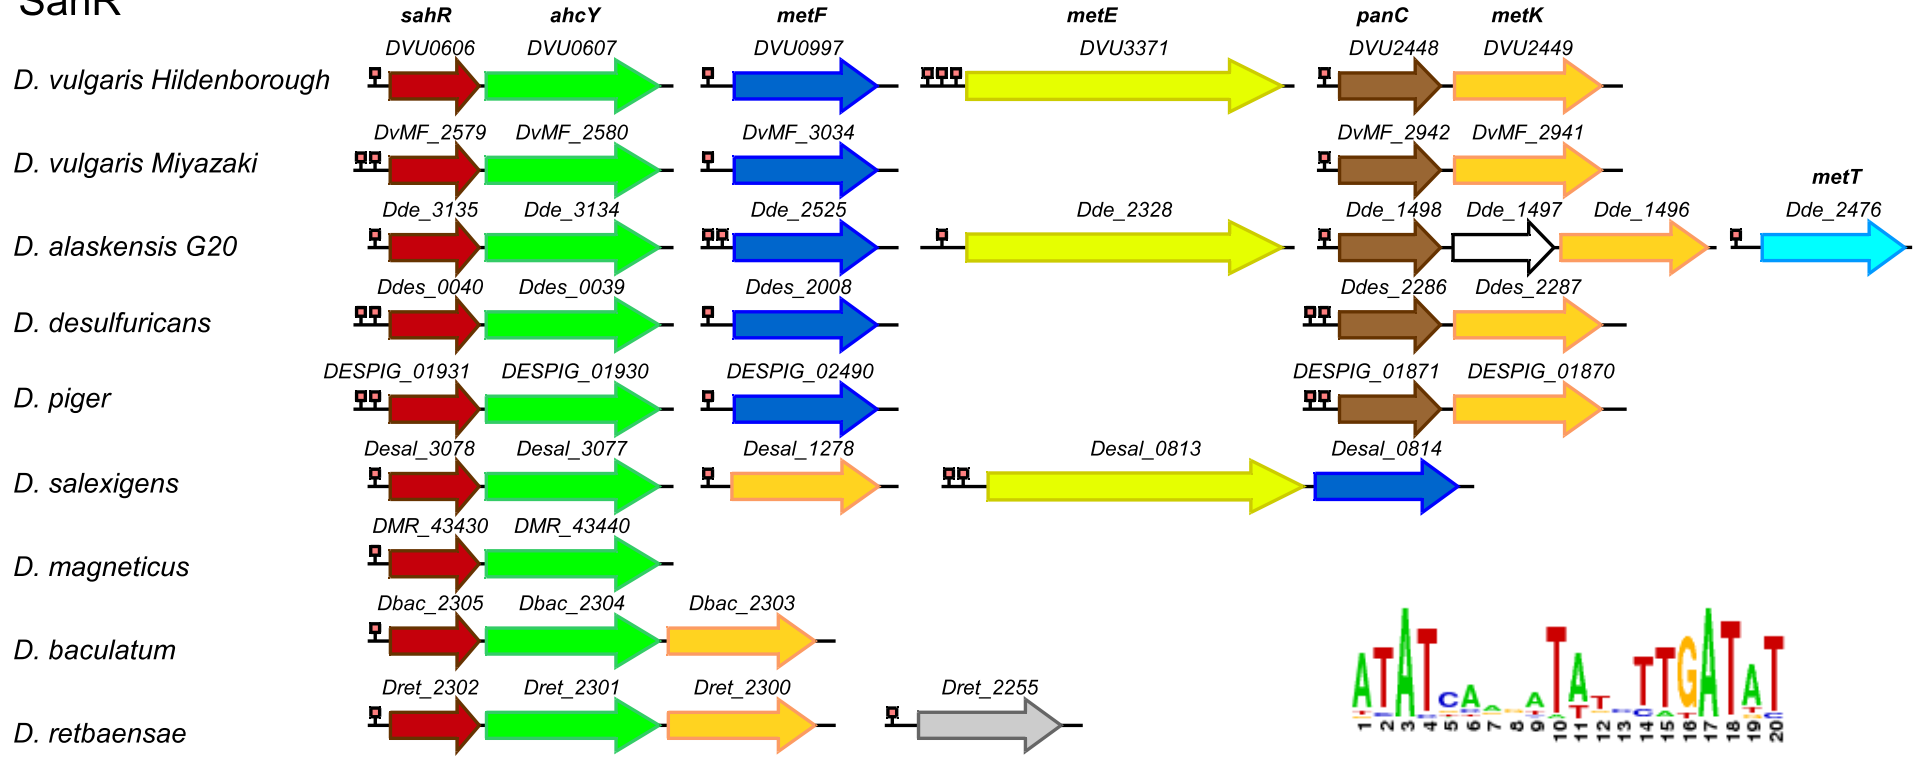

## Gene functions

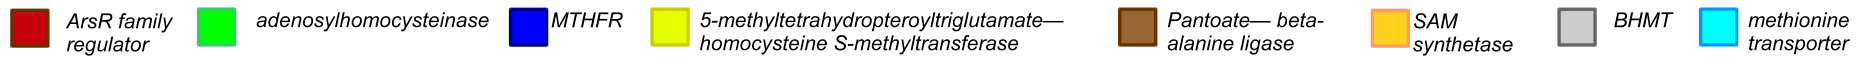

FIG S4 Genomic organization of SahR regulon.

## Reference regulons

### SmtB

*D. vulgaris* Hildenborough

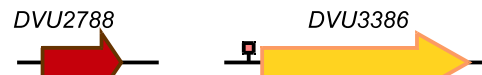

*D. vulgaris* Miyazaki

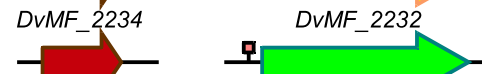

*D. alaskensis* G20

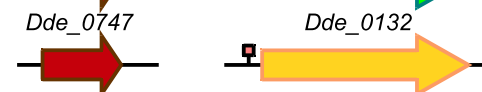

*D. salexigens*

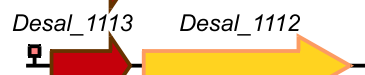

*D. baculatum*

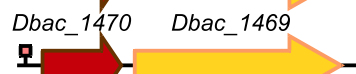

*D. retbaensae*

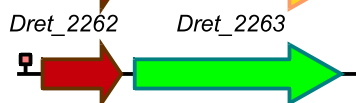

## Singletons

### Ddes\_1264

*D. desulfuricans*

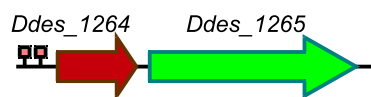

### DMR\_39480

*D. magneticus*

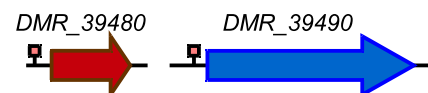

### Dbac\_0377

*D. baculatum*

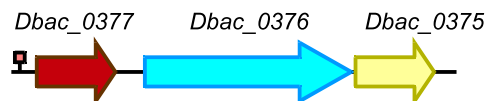

### Dbac\_1936

*D. baculatum*

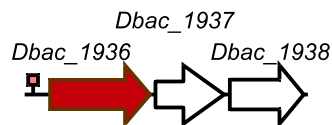

### DESPIG\_02495

*D. piger*

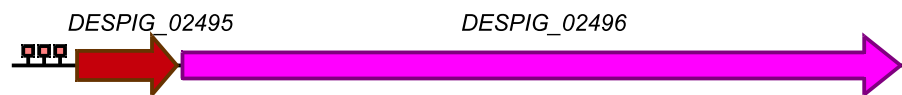

## Gene functions

■ ArsR family regulator

■ DUF318 family permease

■ cation transport P-type ATPase

■ NADPH-dependent FMN reductase

■ putative hydrolase

■ corrinoid iron-sulfur protein

■ ferredoxin

■ Acyl-CoA synthase/ MFS transporter

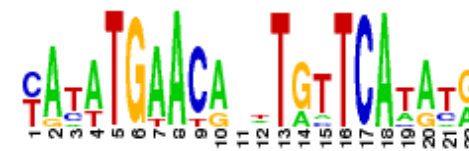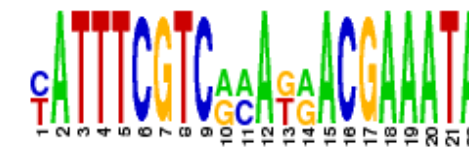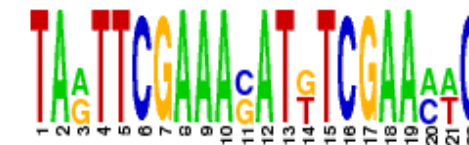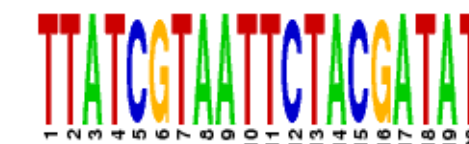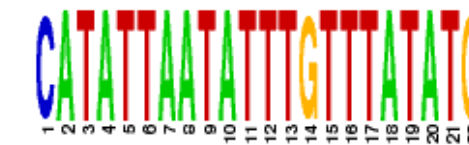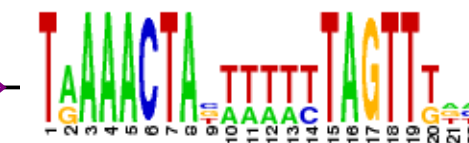

FIG S5 Genomic organization of SmtB regulon and ArsR family singletons.

## Reference regulons

### ArsR

*D. vulgaris* Hildenborough

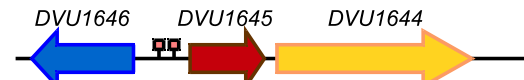

*D. vulgaris* Miyazaki

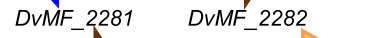

*D. alaskensis* G20

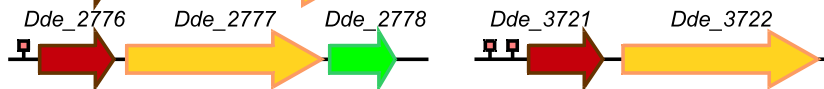

*D. piger*

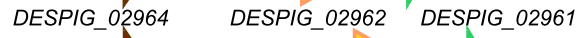

*D. salexigens*

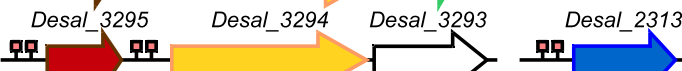

*D. magneticus*

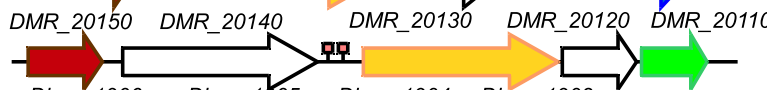

*D. baculatum*

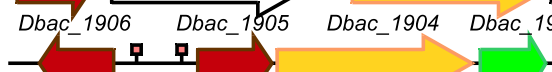

*D. retbaensae*

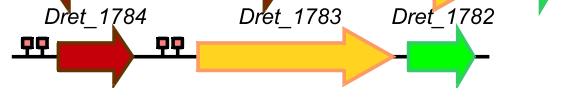

## Gene functions

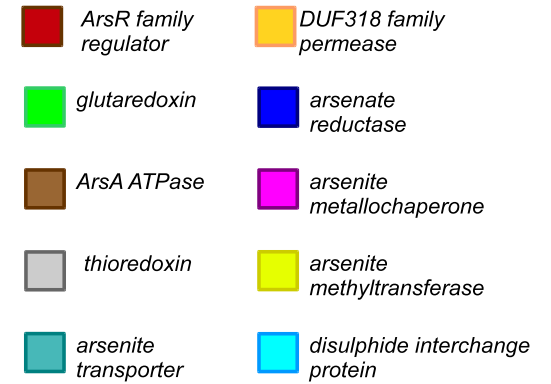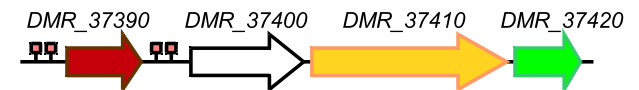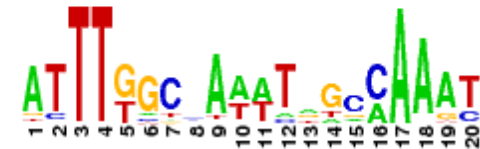

### ArsR2

*D. alaskensis* G20

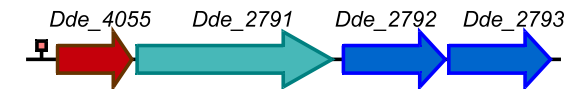

*D. salexigens*

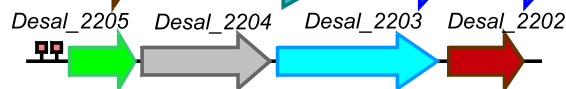

*D. magneticus*

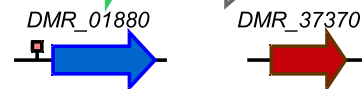

*D. baculatum*

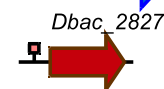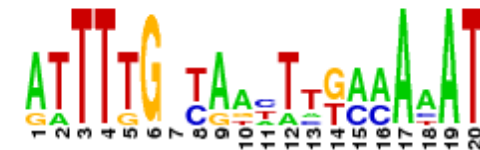

## Singletons

DvMF\_2392, Ddes\_1925

*D. vulgaris* Miyazaki

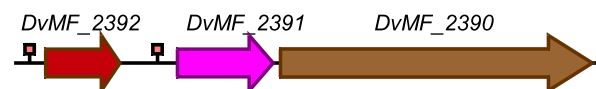

*D. desulfuricans*

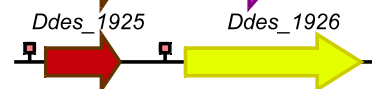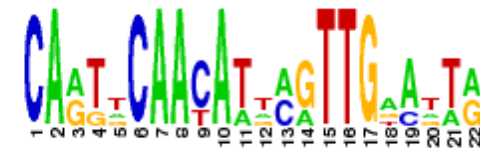

FIG S6 Genomic organization of arsenic resistance regulatory systems.

## Reference regulons

### LldR

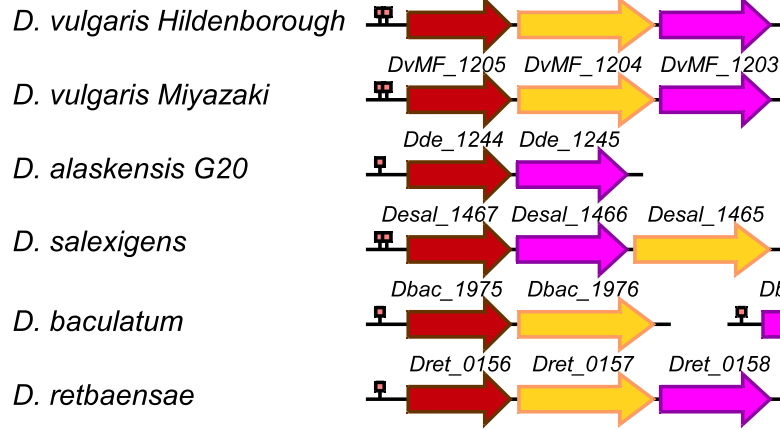

## Gene functions

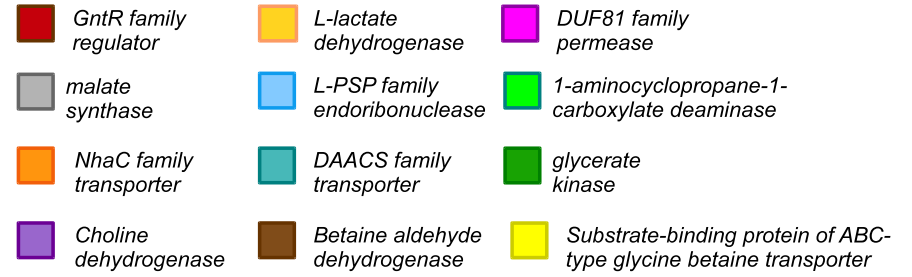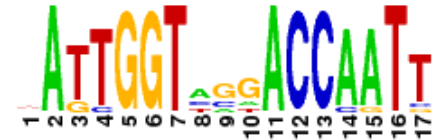

### DVU2644

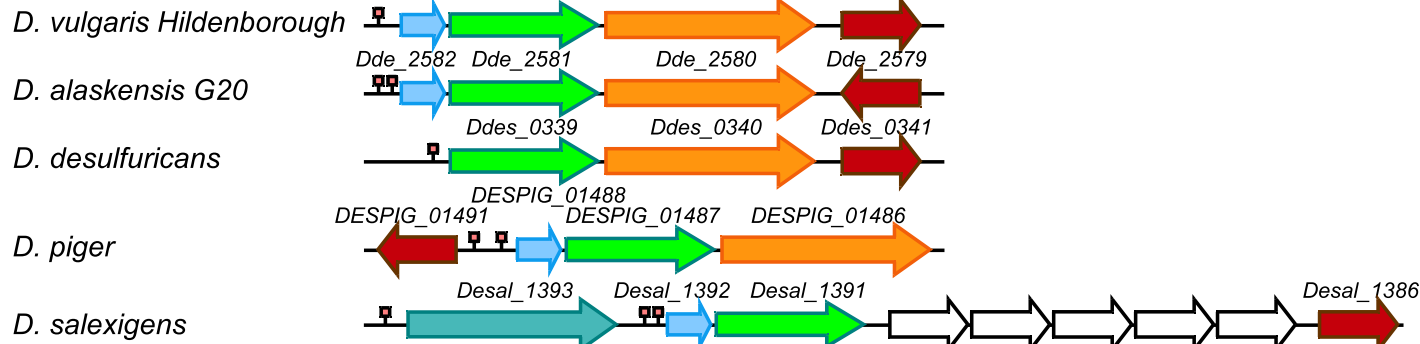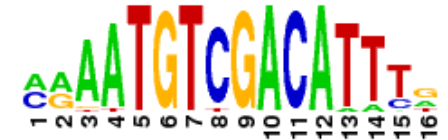

## Singletons

### Desal\_0038

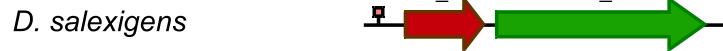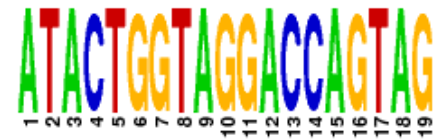

### Dbac\_2821

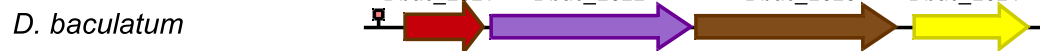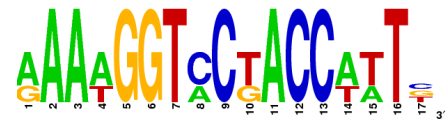

FIG S7 Genomic organization of FadR subfamily regulatory systems.

## Reference regulons

### DVU0030

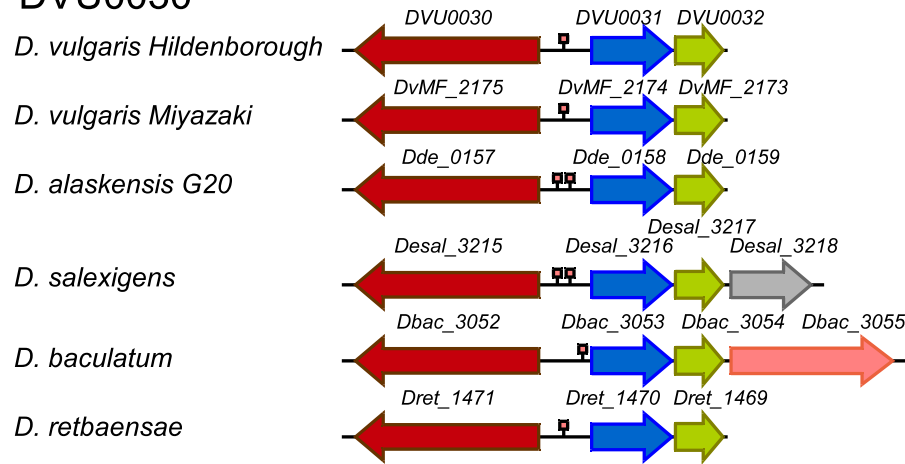

## Gene functions

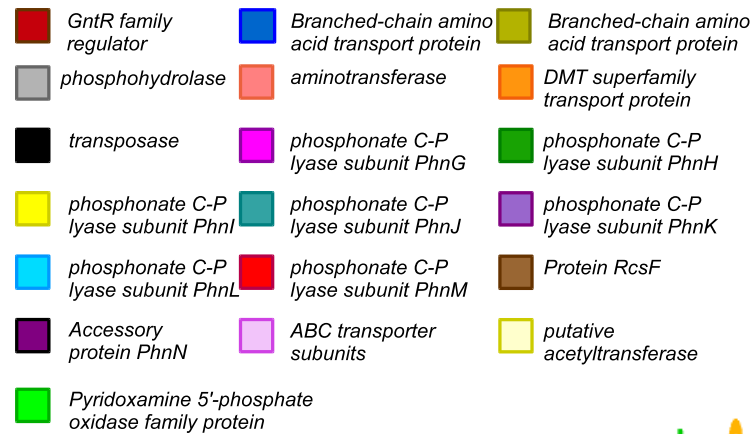

### DVU2953

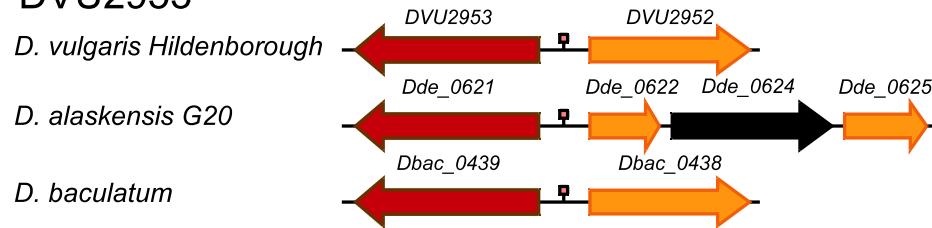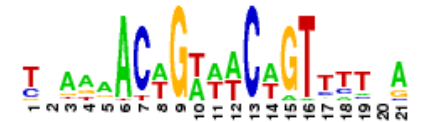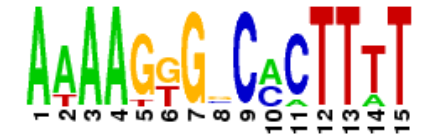

## Singletons

### Ddes\_1162

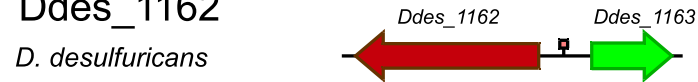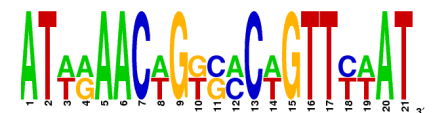

### PhnF

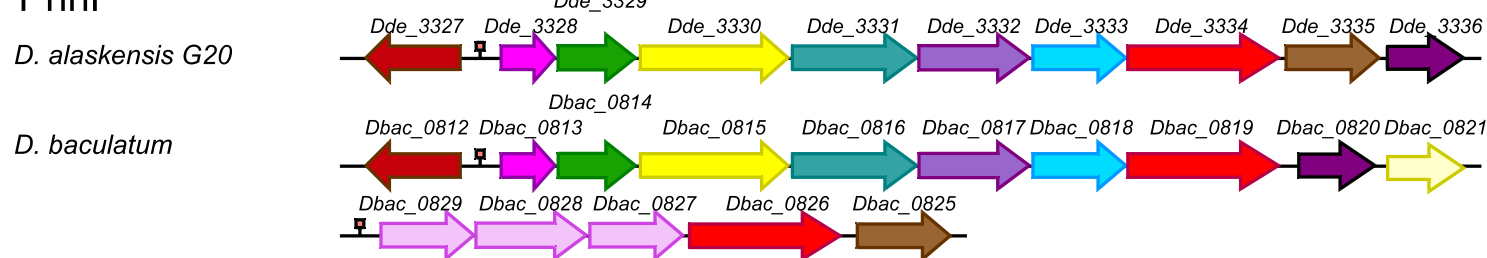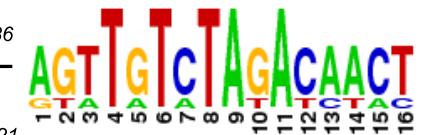

FIG S8 Genomic organization of MocR and HutC subfamilies regulatory systems.



# DVU2802

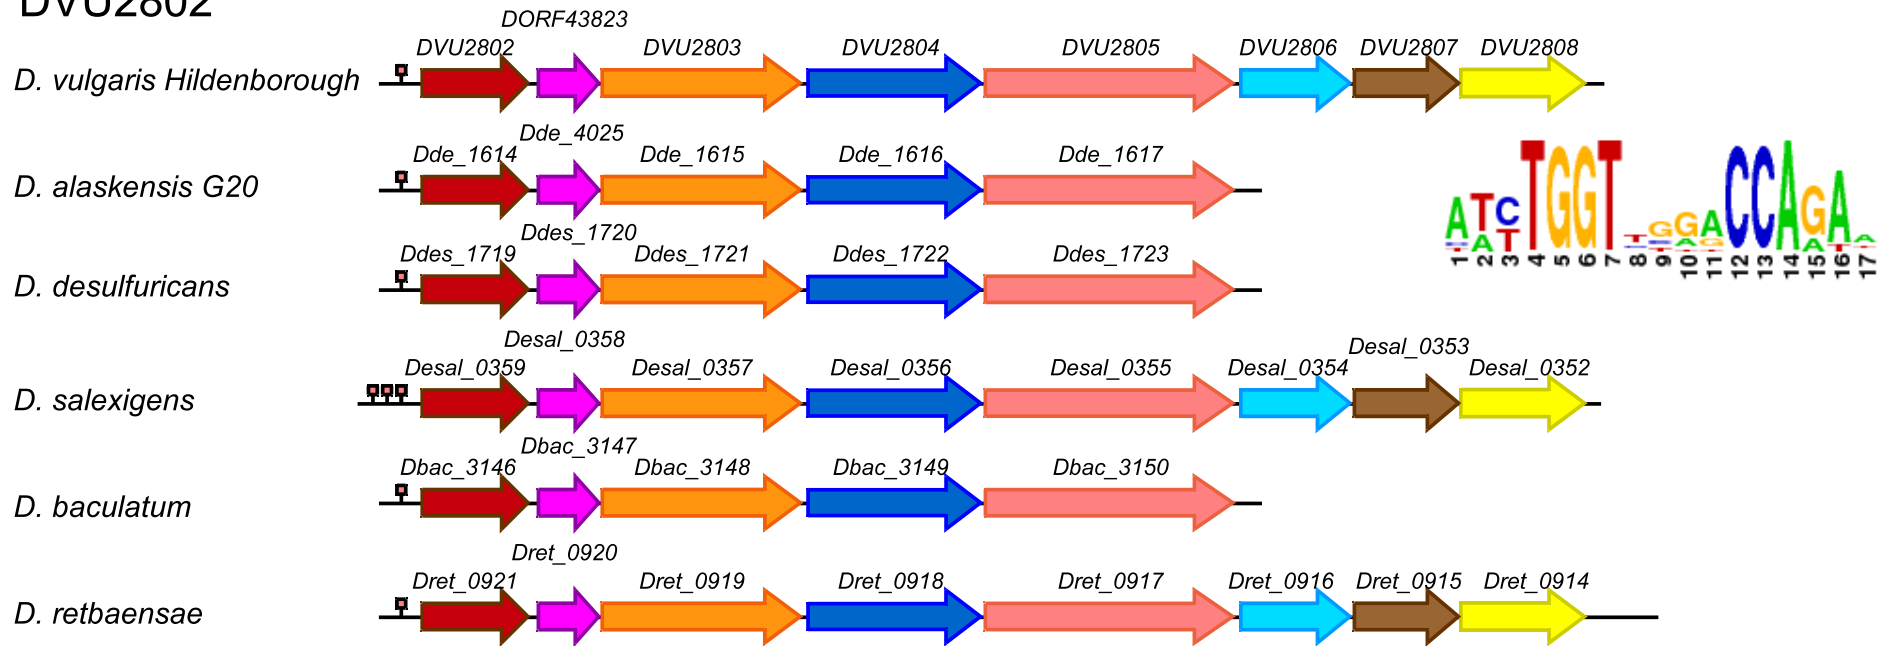

## Gene functions

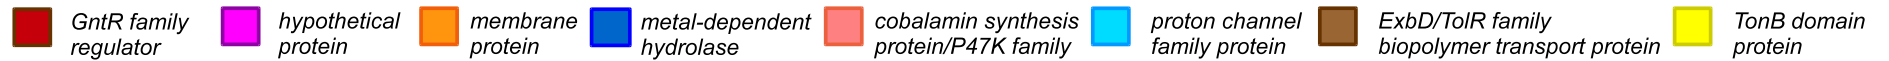

FIG S9 Genomic organization of DVU2802 subfamily regulatory systems.

**TABLE S1** Regulatory proteins of Crp/Fnr, ArsR and GntR TF families from *Desulfovibrionales*.

| Gene ID      | Genome                                           | TF family | Orthology group | Singleton TF |
|--------------|--------------------------------------------------|-----------|-----------------|--------------|
| DVU2097      | <i>Desulfovibrio vulgaris</i> str. Hildenborough | Crp/Fnr   | CooA            |              |
| DVU0379      | <i>Desulfovibrio vulgaris</i> str. Hildenborough | Crp/Fnr   | MreC            |              |
| DVU3111      | <i>Desulfovibrio vulgaris</i> str. Hildenborough | Crp/Fnr   | DVU3111         | S            |
| DVU2547      | <i>Desulfovibrio vulgaris</i> str. Hildenborough | Crp/Fnr   | HcpR            |              |
| DvMF 2234    | <i>Desulfovibrio vulgaris</i> str. Miyazaki      | Crp/Fnr   | CooA            |              |
| DvMF 0993    | <i>Desulfovibrio vulgaris</i> str. Miyazaki      | Crp/Fnr   | HcpR            |              |
| DvMF 1708    | <i>Desulfovibrio vulgaris</i> str. Miyazaki      | Crp/Fnr   | DvMF 1708       |              |
| Dde 3027     | <i>Desulfovibrio alaskensis</i> str. G20         | Crp/Fnr   | CooA            |              |
| Dde 0463     | <i>Desulfovibrio alaskensis</i> str. G20         | Crp/Fnr   | MreC            |              |
| Dde 2644     | <i>Desulfovibrio alaskensis</i> str. G20         | Crp/Fnr   | HcpR            |              |
| Dde 1200     | <i>Desulfovibrio alaskensis</i> str. G20         | Crp/Fnr   | Dde 1200        | S            |
| Ddes 0383    | <i>Desulfovibrio desulfuricans</i> ATCC 2774     | Crp/Fnr   | CooA            |              |
| Ddes 1411    | <i>Desulfovibrio desulfuricans</i> ATCC 2774     | Crp/Fnr   | Ddes 1411       | S            |
| Ddes 2092    | <i>Desulfovibrio desulfuricans</i> ATCC 2774     | Crp/Fnr   | Ddes 1411       | S            |
| Ddes 0528    | <i>Desulfovibrio desulfuricans</i> ATCC 2774     | Crp/Fnr   | Ddes 0528       | S            |
| Ddes 1827    | <i>Desulfovibrio desulfuricans</i> ATCC 2774     | Crp/Fnr   | Ddes 1827       | S            |
| DESPIG 03026 | <i>Desulfovibrio piger</i> ATCC 29098            | Crp/Fnr   | Ddes 0528       | S            |
| DESPIG 02293 | <i>Desulfovibrio piger</i> ATCC 29098            | Crp/Fnr   | DvMF 1708       | S            |
| Desal 2509   | <i>Desulfovibrio salexigens</i> DSM 2638         | Crp/Fnr   | CooA            |              |
| Desal 1361   | <i>Desulfovibrio salexigens</i> DSM 2638         | Crp/Fnr   | MreC            |              |
| Desal 2853   | <i>Desulfovibrio salexigens</i> DSM 2638         | Crp/Fnr   | HcpR            |              |
| Desal 0411   | <i>Desulfovibrio salexigens</i> DSM 2638         | Crp/Fnr   | Dde 1200        | S            |
| Desal 0494   | <i>Desulfovibrio salexigens</i> DSM 2638         | Crp/Fnr   | Desal 0494      | S            |
| Desal 3734   | <i>Desulfovibrio salexigens</i> DSM 2638         | Crp/Fnr   | Desal 3734      | S            |
| Desal 2066   | <i>Desulfovibrio salexigens</i> DSM 2638         | Crp/Fnr   | Desal 2066      |              |
| DMR 25770    | <i>Desulfovibrio magneticus</i> RS-1             | Crp/Fnr   | CooA            |              |
| DMR 35320    | <i>Desulfovibrio magneticus</i> RS-1             | Crp/Fnr   | HcpR            |              |
| DMR 29690    | <i>Desulfovibrio magneticus</i> RS-1             | Crp/Fnr   | DvMF 1708       |              |
| DMR 38640    | <i>Desulfovibrio magneticus</i> RS-1             | Crp/Fnr   | Desal 2066      |              |
| Dbac 0932    | <i>Desulfomicrobium baculatum</i> DSM 4028       | Crp/Fnr   | CooA            |              |
| Dbac 2118    | <i>Desulfomicrobium baculatum</i> DSM 4028       | Crp/Fnr   | HcpR            |              |
| Dret 1233    | <i>Desulfohalobium retbaense</i> DSM 5692        | Crp/Fnr   | CooA            |              |
| Dret 1279    | <i>Desulfohalobium retbaense</i> DSM 5692        | Crp/Fnr   | HcpR            |              |
| Dret 1643    | <i>Desulfohalobium retbaense</i> DSM 5692        | Crp/Fnr   | Desal 2066      |              |
| DVU1645      | <i>Desulfovibrio vulgaris</i> str. Hildenborough | ArsR      | ArsR            |              |
| DVU2788      | <i>Desulfovibrio vulgaris</i> str. Hildenborough | ArsR      | SmtB            |              |
| DVU0606      | <i>Desulfovibrio vulgaris</i> str. Hildenborough | ArsR      | SahR            |              |
| DvMF 2281    | <i>Desulfovibrio vulgaris</i> str. Miyazaki      | ArsR      | ArsR            |              |
| DvMF 1207    | <i>Desulfovibrio vulgaris</i> str. Miyazaki      | ArsR      | SmtB            |              |
| DvMF 2579    | <i>Desulfovibrio vulgaris</i> str. Miyazaki      | ArsR      | SahR            |              |
| DvMF 2392    | <i>Desulfovibrio vulgaris</i> str. Miyazaki      | ArsR      | ArsR3           | S            |

|              |                                           |      |              |   |
|--------------|-------------------------------------------|------|--------------|---|
| Dde 3721     | Desulfovibrio alaskensis str. G20         | ArsR | ArsR         |   |
| Dde 2776     | Desulfovibrio alaskensis str. G20         | ArsR | ArsR         |   |
| Dde 4055     | Desulfovibrio alaskensis str. G20         | ArsR | ArsR2        |   |
| Dde 0747     | Desulfovibrio alaskensis str. G20         | ArsR | SmtB         |   |
| Dde 3135     | Desulfovibrio alaskensis str. G20         | ArsR | SahR         |   |
| Ddes 0040    | Desulfovibrio desulfuricans ATCC 2774     | ArsR | SahR         |   |
| Ddes 1264    | Desulfovibrio desulfuricans ATCC 2774     | ArsR | Ddes 1264    | S |
| Ddes 1925    | Desulfovibrio desulfuricans ATCC 2774     | ArsR | ArsR3        | S |
| DESPIG 02964 | Desulfovibrio piger ATCC 29098            | ArsR | ArsR         |   |
| DESPIG 01931 | Desulfovibrio piger ATCC 29098            | ArsR | SahR         |   |
| DESPIG 02495 | Desulfovibrio piger ATCC 29098            | ArsR | DESPIG 02495 | S |
| Desal 3295   | Desulfovibrio salexigens DSM 2638         | ArsR | ArsR         |   |
| Desal 2202   | Desulfovibrio salexigens DSM 2638         | ArsR | ArsR2        |   |
| Desal 1113   | Desulfovibrio salexigens DSM 2638         | ArsR | SmtB         |   |
| Desal 3078   | Desulfovibrio salexigens DSM 2638         | ArsR | SahR         |   |
| DMR 20150    | Desulfovibrio magneticus RS-1             | ArsR | ArsR         |   |
| DMR 37390    | Desulfovibrio magneticus RS-1             | ArsR | ArsR         |   |
| DMR 37370    | Desulfovibrio magneticus RS-1             | ArsR | ArsR2        |   |
| DMR 43430    | Desulfovibrio magneticus RS-1             | ArsR | SahR         |   |
| DMR 39480    | Desulfovibrio magneticus RS-1             | ArsR | DMR 39480    | S |
| DMR 45340    | Desulfovibrio magneticus RS-1             | ArsR | DMR 45340    | S |
| Dbac 1905    | Desulfomicrobium baculatum DSM 4028       | ArsR | ArsR         |   |
| Dbac 1906    | Desulfomicrobium baculatum DSM 4028       | ArsR | ArsR         |   |
| Dbac 2827    | Desulfomicrobium baculatum DSM 4028       | ArsR | ArsR2        |   |
| Dbac 1470    | Desulfomicrobium baculatum DSM 4028       | ArsR | SmtB         |   |
| Dbac 2305    | Desulfomicrobium baculatum DSM 4028       | ArsR | SahR         |   |
| Dbac 0377    | Desulfomicrobium baculatum DSM 4028       | ArsR | Dbac 0377    | S |
| Dbac 1936    | Desulfomicrobium baculatum DSM 4028       | ArsR | Dbac 1936    | S |
| Dret 1784    | Desulfohalobium retbaense DSM 5692        | ArsR | ArsR         |   |
| Dret 2262    | Desulfohalobium retbaense DSM 5692        | ArsR | SmtB         |   |
| Dret 2302    | Desulfohalobium retbaense DSM 5692        | ArsR | SahR         |   |
| DVU0030      | Desulfovibrio vulgaris str. Hildenborough | GntR | DVU0030      |   |
| DVU2644      | Desulfovibrio vulgaris str. Hildenborough | GntR | DVU2644      |   |
| DVU2802      | Desulfovibrio vulgaris str. Hildenborough | GntR | DVU2802      |   |
| DVU2953      | Desulfovibrio vulgaris str. Hildenborough | GntR | DVU2953      |   |
| DVU2785      | Desulfovibrio vulgaris str. Hildenborough | GntR | LldR         |   |
| DVU2086      | Desulfovibrio vulgaris str. Hildenborough | GntR | DVU2086      | S |
| DvMF 2175    | Desulfovibrio vulgaris str. Miyazaki      | GntR | DVU0030      |   |
| DvMF 1205    | Desulfovibrio vulgaris str. Miyazaki      | GntR | LldR         |   |
| DvMF 0513    | Desulfovibrio vulgaris str. Miyazaki      | GntR | DvMF 0513    | S |
| DvMF 1479    | Desulfovibrio vulgaris str. Miyazaki      | GntR | DvMF 1479    | S |
| DvMF 1994    | Desulfovibrio vulgaris str. Miyazaki      | GntR | DvMF 1994    | S |
| DvMF 2022    | Desulfovibrio vulgaris str. Miyazaki      | GntR | DvMF 2022    | S |

|              |                                       |      |              |   |
|--------------|---------------------------------------|------|--------------|---|
| DvMF 2930    | Desulfovibrio vulgaris str. Miyazaki  | GntR | DvMF 2930    | S |
| DvMF 3005    | Desulfovibrio vulgaris str. Miyazaki  | GntR | DvMF 3005    | S |
| Dde 0157     | Desulfovibrio alaskensis str. G20     | GntR | DVU0030      |   |
| Dde 2579     | Desulfovibrio alaskensis str. G20     | GntR | DVU2644      |   |
| Dde 1614     | Desulfovibrio alaskensis str. G20     | GntR | DVU2802      |   |
| Dde 0621     | Desulfovibrio alaskensis str. G20     | GntR | DVU2953      |   |
| Dde 0749     | Desulfovibrio alaskensis str. G20     | GntR | LldR         |   |
| Dde 1244     | Desulfovibrio alaskensis str. G20     | GntR | LldR         |   |
| Dde 3327     | Desulfovibrio alaskensis str. G20     | GntR | PhnF         | S |
| Ddes 0341    | Desulfovibrio desulfuricans ATCC 2774 | GntR | DVU2644      |   |
| Ddes 1719    | Desulfovibrio desulfuricans ATCC 2774 | GntR | DVU2802      |   |
| Ddes 1162    | Desulfovibrio desulfuricans ATCC 2774 | GntR | Ddes 1162    | S |
| Ddes 0854    | Desulfovibrio desulfuricans ATCC 2774 | GntR | Ddes 0854    | S |
| DESPIG 01491 | Desulfovibrio piger ATCC 29098        | GntR | DVU2644      |   |
| DESPIG 00074 | Desulfovibrio piger ATCC 29098        | GntR | DESPIG 00074 | S |
| DESPIG 01888 | Desulfovibrio piger ATCC 29098        | GntR | DESPIG 01888 | S |
| DESPIG 02282 | Desulfovibrio piger ATCC 29098        | GntR | DESPIG 02282 | S |
| DESPIG 02737 | Desulfovibrio piger ATCC 29098        | GntR | DESPIG 02737 | S |
| Desal 3215   | Desulfovibrio salexigens DSM 2638     | GntR | DVU0030      |   |
| Desal 1386   | Desulfovibrio salexigens DSM 2638     | GntR | DVU2644      |   |
| Desal 0359   | Desulfovibrio salexigens DSM 2638     | GntR | DVU2802      |   |
| Desal 1467   | Desulfovibrio salexigens DSM 2638     | GntR | LldR         |   |
| Desal 0038   | Desulfovibrio salexigens DSM 2638     | GntR | Desal 0038   | S |
| Desal 2890   | Desulfovibrio salexigens DSM 2638     | GntR | Desal 2890   | S |
| Desal 2919   | Desulfovibrio salexigens DSM 2638     | GntR | Desal 2919   | S |
| Desal 3557   | Desulfovibrio salexigens DSM 2638     | GntR | Desal 3557   | S |
| Desal 3745   | Desulfovibrio salexigens DSM 2638     | GntR | Desal 3745   | S |
| DMR 35550    | Desulfovibrio magneticus RS-1         | GntR | DVU0030      |   |
| DMR 17410    | Desulfovibrio magneticus RS-1         | GntR | DMR 17410    | S |
| LI0606       | Lawsonia intracellularis PHE/MN1-00   | GntR | LI0606       | S |
| Dbac 3052    | Desulfomicrobium baculatum DSM 4028   | GntR | DVU0030      |   |
| Dbac 3146    | Desulfomicrobium baculatum DSM 4028   | GntR | DVU2802      |   |
| Dbac 0439    | Desulfomicrobium baculatum DSM 4028   | GntR | DVU2953      |   |
| Dbac 1975    | Desulfomicrobium baculatum DSM 4028   | GntR | LldR         |   |
| Dbac 0812    | Desulfomicrobium baculatum DSM 4028   | GntR | PhnF         | S |
| Dbac 1979    | Desulfomicrobium baculatum DSM 4028   | GntR | Dbac 1979    | S |
| Dbac 2821    | Desulfomicrobium baculatum DSM 4028   | GntR | Dbac 2821    | S |
| Dret 1471    | Desulfohalobium retbaense DSM 5692    | GntR | DVU0030      |   |
| Dret 0921    | Desulfohalobium retbaense DSM 5692    | GntR | DVU2802      |   |
| Dret 0156    | Desulfohalobium retbaense DSM 5692    | GntR | LldR         |   |
| Dret 0942    | Desulfohalobium retbaense DSM 5692    | GntR | Dret 0942    | S |

**TABLE S2** Predicted binding sites of Crp/Fnr family TFs. <sup>a</sup>Positions relative to the start of translation

| Regulon      | Genome                                                                         | Operon                | Distance | Site               |
|--------------|--------------------------------------------------------------------------------|-----------------------|----------|--------------------|
| CooA         | <i>Desulfohalobium retbaense</i> DSM 5692                                      | Dret_1234-Dret_1235   | -93      | TTGTCAGCCAGCTGACAG |
|              | <i>Desulfomicrobium baculatum</i> DSM 4028                                     | Dbac_0934-Dbac_0933   | -130     | CTGTCAGCTAGGCGACAG |
|              | <i>Desulfovibrio alaskensis</i> G20                                            | Dde_3028-Dde_3029     | -113     | GTGTCAGCCAGCCGACAA |
|              | <i>Desulfovibrio desulfuricans</i> subsp. <i>desulfuricans</i> str. ATCC 27774 | Ddes_0382-Ddes_0381   | -118     | TTGTCAGCCAGCCGACAG |
|              | <i>Desulfovibrio magneticus</i> RS-1                                           | DMR_25780-DMR_25790   | -99      | TTGTCGGCAATCTGACAG |
|              | <i>Desulfovibrio salexigens</i> DSM 2638                                       | Desal_2508-Desal_2507 | -108     | TTGTCGGGTACCCGACAA |
|              | <i>Desulfovibrio vulgaris</i> Hildenborough                                    | DVU2098-DVU2099       | -187     | TTGTCGGCTAGCCGACAG |
|              | <i>Desulfovibrio vulgaris</i> str. Miyazaki F                                  | DvMF_2233-DvMF_2232   | -182     | CTGTCGGCTAGCCGACAT |
| Dde_1200     | <i>Desulfovibrio alaskensis</i> G20                                            | Dde_1201-Dde_1204     | -171     | TTGTCTCTTGTGAGACAG |
| Desal_0411   | <i>Desulfovibrio salexigens</i> DSM 2638                                       | Desal_0410-Desal_0407 | -103     | TTGTCTCATATGAGACAG |
| Ddes_0528    | <i>Desulfovibrio desulfuricans</i> subsp. <i>desulfuricans</i> str. ATCC 27774 | Ddes_0528             | -162     | TTGTGACTACAGTCACAG |
|              |                                                                                | Ddes_1164             | -99      | TTGTGCGTATACTCACAG |
| Ddes_1411    | <i>Desulfovibrio desulfuricans</i> subsp. <i>desulfuricans</i> str. ATCC 27774 | Ddes_1413             | -227     | TTGTTGTTGGTGCAACAT |
|              |                                                                                |                       | -101     | ATGTTGCATGGGCAACAA |
|              |                                                                                | Ddes_1412             | -128     | TTGTTGCAATGACAACAT |
|              |                                                                                | Ddes_1414             | -125     | ATGTTGCACCAACAACAA |
|              |                                                                                | Ddes_1411             | -189     | ATGTTGTCATTGCAACAA |
| -39          | ATGTTGCAACAGCATGAA                                                             |                       |          |                    |
| Ddes_1827    | <i>Desulfovibrio desulfuricans</i> subsp. <i>desulfuricans</i> str. ATCC 27774 | Ddes_1828-Ddes_1829   | -71      | CCGTAACAATTGTTACGG |
| Ddes_2092    | <i>Desulfovibrio desulfuricans</i> subsp. <i>desulfuricans</i> str. ATCC 27774 | Ddes_2093-Ddes_2095   | -129     | ATGTTGCATACGGAACAC |
|              |                                                                                | Ddes_2092             | -97      | GTGTTCCGTATGCAACAT |
| Desal_0494   | <i>Desulfovibrio salexigens</i> DSM 2638                                       | Desal_0493            | -81      | CAGTGACCTGCGTCATTG |
| Desal_2066   | <i>Desulfohalobium retbaense</i> DSM 5692                                      | Dret_2254             | -305     | CATTGATCTCAATCAATG |
|              |                                                                                | Dret_1643             | -85      | CATTGATGCAGATCAAGG |
|              | <i>Desulfovibrio magneticus</i> RS-1                                           | DMR_38630-DMR_38620   | -82      | CGTTGATCCACATCAATG |
|              |                                                                                | DMR_38640             | -87      | CATTGATGTGGATCAACG |
|              | <i>Desulfovibrio salexigens</i> DSM 2638                                       | Desal_2066            | -40      | CATTGATCTCGATCAACA |
|              |                                                                                | Desal_2272            | -97      | CGTTGATCTGGATCAATG |
| DESPIG_03026 | <i>Desulfovibrio piger</i> ATCC 29098                                          | DESPIG_03025-         | -107     | CTGTGAAAAGATTCCCTG |
|              |                                                                                | DESPIG_03026          | -87      | TTGTGACGATGGTCACAG |
| DvMF_1708    | <i>Desulfovibrio magneticus</i> RS-1                                           | DMR_29660-DMR_29690   | -83      | TTATCGTCCCCGCGATAG |
|              | <i>Desulfovibrio piger</i> ATCC 29098                                          | DESPIG_02289          | -86      | CTATCGGCGGGCTGATAG |
|              | <i>Desulfovibrio vulgaris</i> str. Miyazaki F                                  | DvMF_1711-DvMF_1707   | -151     | TTATCGTCCCCGCGATAG |
| MreC         | <i>Desulfovibrio alaskensis</i> G20                                            | Dde_0461-Dde_0467     | -258     | CTGTAGCAAATGCTACGG |
|              | <i>Desulfovibrio salexigens</i> DSM 2638                                       | Desal_1359-Desal_1364 | -154     | ATGTTGCATTTGCAACGG |
|              | <i>Desulfovibrio vulgaris</i> Hildenborough                                    | DVU0381-DVU0374       | -163     | CTGTTGCGGGTGCAACCG |

|         |                                        |                       |             |                                          |
|---------|----------------------------------------|-----------------------|-------------|------------------------------------------|
| DVU3111 | Desulfovibrio vulgaris Hildenborough   | DVU3110-DVU3109       | -74         | CTGTAGCCCAGGCTACGG                       |
|         |                                        | DVU3108               | -101        | CCGTGATGCCCGCCACGG                       |
|         |                                        | DVU3111               | -122        | CCGTGCTGGGCATGACTG                       |
| HcpR    | Desulfohalobium retbaense DSM 5692     | Dret_2386             | -121        | TTTTGACTCAGGTCAAAG                       |
|         |                                        | Dret_2382             | -105        | TTTTGATGCAGGTCAAAG                       |
|         |                                        | Dret_1280             | -93         | ATTTGATCCGCGTCAAAG                       |
|         | Desulfomicrobium baculatum DSM 4028    | Dbac_1379-Dbac_1378   | -52         | TTTTGACCTAGGTCAAAG                       |
|         |                                        | Dbac_1823             | -74         | TTTTGACATGGGTCAAAG                       |
|         |                                        | Dbac_0596             | -94         | TTTTGATCTGCGTCAAAG                       |
|         |                                        | Dbac_2941             | -82         | TTTTGATCCAGTCAAAG                        |
|         | Desulfovibrio alaskensis G20           | Dde_2303              | -111        | TTTTGACGTGGGTCAACG                       |
|         |                                        | Dde_2390-Dde_2389     | -80         | ATGTGACCTGCATCACAG                       |
|         |                                        | Dde_0503              | -50         | ATGTGACGCAGGTCAACG                       |
|         |                                        | Dde_2641-Dde_2642     | -153        | TTGTGACTCCGGTCAAT                        |
|         | Desulfovibrio magneticus RS-1          | DMR_35370-DMR_35390   | -94         | TTTTGACTTAGGTCAAAC                       |
|         |                                        | DMR_35330-DMR_35340   | -93         | GCTTGACGTAAGTCAAAG                       |
|         |                                        | DMR_12610-DMR_12600   | -64         | ATTTGACTTAGGTCAATG                       |
|         |                                        | DMR_35320             | -41         | CCTTGACTTACGTCAAAG                       |
|         | Desulfovibrio salexigens DSM 2638      | Desal_0751-Desal_0750 | -151        | TTTTGACTTAAGTCATAG                       |
|         |                                        | Desal_2853            | -51         | CCCTGACTTAAGTCATTT                       |
|         |                                        | Desal_2849            | -238<br>-88 | CCTTGACCTGAATCAAAT<br>TTTTGATCTGAATCAAAT |
|         |                                        | Desal_2852-Desal_2851 | -77         | AAATGACTTAAGTCAGGG                       |
|         | Desulfovibrio vulgaris Hildenborough   | DVU2543-DVU2544       | -184        | ATTTGACGCACGTCAACA                       |
|         |                                        | DVU1080-DVU1081       | -234        | GTGTGACCCGCGTCAACG                       |
|         |                                        | DVU3251               | -95         | CTGTGACCCACGTCAACG                       |
|         | Desulfovibrio vulgaris str. Miyazaki F | DvMF_0988-DvMF_0989   | -211        | TTTTGATGTCCGTCAAT                        |
|         |                                        | DvMF_2445             | -122        | ATGTGACCCCGATCAACG                       |

**TABLE S3** Predicted binding sites of ArsR family TFs. <sup>a</sup>Positions relative to the start of translation

| Regulon                           | Genome                                 | Operon                              | Distance          | Site                                          |                      |
|-----------------------------------|----------------------------------------|-------------------------------------|-------------------|-----------------------------------------------|----------------------|
| ArsR                              | Desulfohalobium retbaense DSM 5692     | Dret_1784                           | -20<br>-12        | ATTTGGTTACTTTGCCAAGT<br>ACTTTGCCAAGTATGCAAAC  |                      |
|                                   |                                        | Dret_1783-Dret_1782                 | -49<br>-42        | ATTTGGCTTTTTGGGAAAAT<br>TTTTTGGGAAAATAGAAAAT  |                      |
|                                   | Desulfomicrobium baculatum DSM 4028    | Dbac_1906                           | -160<br>-38       | ATTTGCACAAATGACCAAAT<br>GCTTGGCAATATTGCCAAGT  |                      |
|                                   |                                        | Dbac_1905-Dbac_1903                 | -154<br>-32       | ACTTGGCAATATTGCCAAGC<br>ATTTGGTCATTTGTGCAAAT  |                      |
|                                   | Desulfovibrio alaskensis G20           | Dde_3721-Dde_3722                   | -88<br>-39        | ATTTGGCTGAATCGCCAAAT<br>ATTTGGCGAAAAGCCAAAT   |                      |
|                                   |                                        | Dde_2777-Dde_2778                   | -31               | ATTTGGCGAATCAGCCAAAC                          |                      |
|                                   |                                        | Dde_2776-Dde_2778                   | -11               | GCTTGGCCTAATTGCCAAAT                          |                      |
|                                   | Desulfovibrio magneticus RS-1          | DMR_37400-DMR_37420                 | -84<br>-76        | ATTTTGCATTTTGGCAAAAC<br>ATTTGGCAAAACATACAAAT  |                      |
|                                   |                                        | DMR_37390                           | -47<br>-39        | TTTTGGCTATTTTGCCAAAT<br>ATTTTGCCAAATAGAAAACG  |                      |
|                                   |                                        | DMR_20130-DMR_20110                 | -57<br>-49        | ATTTTGCCTTTTTGACCAAAT<br>TTTTGACCAAATAGCAAATC |                      |
|                                   | Desulfovibrio piger ATCC 29098         | DESPIG_02964                        | -31               | ATTTTGCCAAATGACCAAAT                          |                      |
|                                   |                                        | DESPIG_02962                        | -30<br>-22        | ATTTGGCAATTTTGCCAATA<br>ATTTTGCCAATAAGGAATAT  |                      |
|                                   | Desulfovibrio salexigens DSM 2638      | Desal_3294-Desal_3293               | -39<br>-31        | AGTTTCGTATTTGGCAAAAT<br>ATTTGGCAAAATATAAAGAC  |                      |
|                                   |                                        | Desal_2313                          | -38<br>-30        | GTTTTCCCTCTTTGGCAAAAT<br>CTTTGGCAAAATATCCAAAC |                      |
|                                   |                                        | Desal_3295                          | -42<br>-34        | ATTTTTATATTTTGGCAAAC<br>ATTTTGCCAAACAGGAAAGT  |                      |
|                                   | Desulfovibrio vulgaris Hildenborough   | DVU1645-DVU1644                     | -44<br>-36        | ATTTGTCTATTTTGCCAAAT<br>ATTTTGCCAAATAATCAAGT  |                      |
|                                   |                                        | DVU1646                             | -142<br>-134      | ACTTGATTATTTGGCAAAAT<br>ATTTGGCAAAATAGACAAAT  |                      |
|                                   | Desulfovibrio vulgaris str. Miyazaki F | DvMF_2281                           | -12               | ATTTGGCGAAACATGCAAAT                          |                      |
|                                   | ArsR2                                  | Desulfomicrobium baculatum DSM 4028 | Dbac_2827         | -46                                           | GTTTTGACATCTTGACATAT |
|                                   |                                        | Desulfovibrio alaskensis G20        | Dde_2790-Dde_2793 | -143                                          | ATTTTGATGACACTCAAAAT |
| Desulfovibrio magneticus RS-1     |                                        | DMR_01880                           | -226              | ATTTTGGTAGTTTGAAAAAT                          |                      |
| Desulfovibrio salexigens DSM 2638 |                                        | Desal_2205-Desal_2203               | -42<br>-34        | ATTTGGTTAATTTGCCAAAT<br>AATTTGCCAAATATAAACAT  |                      |

|                                        |                                                                  |                               |                       |                        |
|----------------------------------------|------------------------------------------------------------------|-------------------------------|-----------------------|------------------------|
| ArsR3                                  | Desulfovibrio desulfuricans subsp. desulfuricans str. ATCC 27774 | Ddes_1925                     | -29                   | CAATTCAATATAAGTTGAAATA |
|                                        |                                                                  | Ddes_1926                     | -43                   | CAAGGCAACATTAGTTGAATAG |
|                                        | Desulfovibrio vulgaris str. Miyazaki F                           | DvMF_2391-DvMF_2390           | -65                   | CAGTACAACAAGCATTGGCGTG |
|                                        |                                                                  | DvMF_2392                     | -29                   | CAGTTCAACATTCGTTGTATTA |
| SahR                                   | Desulfohalobium retbaense DSM 5692                               | Dret_2302-Dret_2300           | -172                  | TTATCAACTTTTTTCAGATAT  |
|                                        |                                                                  | Dret_2255                     | -102                  | ATATCAAAATATCTTGATAT   |
|                                        | Desulfomicrobium baculatum DSM 4028                              | Dbac_2305-Dbac_2303           | -45                   | ATATCAGGATATCTTGATAT   |
|                                        | Desulfovibrio alaskensis G20                                     | Dde_1498-Dde_1496             | -18                   | ATATGCGGATACATTGATAT   |
|                                        |                                                                  | Dde_3135-Dde_3134             | 63                    | ACATCAACTTTTTCTTGATTC  |
|                                        |                                                                  | Dde_2328                      | -293                  | ATATTGATGAATCTTGATAT   |
|                                        |                                                                  | Dde_2525                      | -69                   | ATATTACAATAGGTCGATAT   |
|                                        |                                                                  |                               | -45                   | ATATAAGGCTATCTTGATAT   |
|                                        |                                                                  | Dde_2476                      | -131                  | TTATCAACTTAGTTTGATAT   |
|                                        | Desulfovibrio desulfuricans subsp. desulfuricans str. ATCC 27774 | Ddes_0040-Ddes_0039           | -57                   | ATATGCGGATAAAGTTGATAC  |
|                                        |                                                                  |                               | -35                   | GTATCAGCATAAATTTGATTT  |
|                                        |                                                                  | Ddes_2008                     | -80                   | ATATCAATTTTATCTTGATAT  |
|                                        |                                                                  | Ddes_2286-Ddes_2287           | -18                   | ATATCACAATACCTTGATAT   |
|                                        |                                                                  |                               | -10                   | ATACCTTGATATGCAGATAT   |
|                                        | Desulfovibrio magneticus RS-1                                    | DMR_43430-DMR_43440           | -18                   | ATATCAGGATATCTTGATAT   |
|                                        | Desulfovibrio piger ATCC 29098                                   | DESPIG_02490                  | -73                   | TTATCAAGTTATATTGATAT   |
|                                        |                                                                  | DESPIG_01931-<br>DESPIG_01930 | -83                   | ATATCCAGATAGGCTGATAT   |
|                                        |                                                                  |                               | -61                   | GCATCAAGCAAATTTGATAC   |
|                                        |                                                                  | DESPIG_01871-<br>DESPIG_01870 | -18                   | ATATCACCATACCTTGATAT   |
|                                        |                                                                  |                               | -10                   | ATACCTTGATATGCAGATAT   |
|                                        | Desulfovibrio salexigens DSM 2638                                | Desal_1278                    | -111                  | ATATGCAAATTTATTTATAT   |
|                                        |                                                                  | Desal_0813-Desal_0814         | -282                  | ATATAACAATATTTTTATAT   |
|                                        |                                                                  |                               | -274                  | ATATTTTTATATATTGAATT   |
| Desal_3078-Desal_3077                  |                                                                  | -39                           | ATATAAAGGTTTTGTTATGT  |                        |
| Desulfovibrio vulgaris Hildenborough   | DVU3371                                                          | -341                          | ATATCAGTATTTCTTGATGT  |                        |
|                                        | DVU0997                                                          | -87                           | ATATCAATCTATCTTGATAT  |                        |
|                                        | DVU2448-DVU2449                                                  | -18                           | ATATGTGGATAGGTTGATAT  |                        |
|                                        | DVU0606-DVU0607                                                  | -52                           | ACATCAAGTTTTCTTGATTT  |                        |
| Desulfovibrio vulgaris str. Miyazaki F | DvMF_3034                                                        | -208                          | ATATCAAGATAGCTTGATAT  |                        |
|                                        | DvMF_2579-DvMF_2580                                              | -103                          | AAATCAAGTTTTCTTGATGT  |                        |
|                                        | DvMF_2942-DvMF_2941                                              | -18                           | ATATTCGGATAAAGTTGATAT |                        |



|              |                                                                  |                               |              |                                                     |
|--------------|------------------------------------------------------------------|-------------------------------|--------------|-----------------------------------------------------|
| SmtB         | Desulfohalobium retbaense DSM 5692                               | Dret_2262-Dret_2261           | -47          | TAATTGAACAATTGATCAAGCG                              |
|              | Desulfomicrobium baculatum DSM 4028                              | Dbac_1470-Dbac_1469           | -64          | TACTTGAACAACACTATTCAAGCG                            |
|              | Desulfovibrio alaskensis G20                                     | Dde_0132                      | -61<br>-45   | CATATGAACGATTGCTCATATG<br>CATATGTATGTTTGTTTCATAAA   |
|              | Desulfovibrio salexigens DSM 2638                                | Desal_1113-Desal_1112         | -42          | TATATGAACAGTTGTTTCATATA                             |
|              | Desulfovibrio vulgaris Hildenborough                             | DVU3386                       | -19          | CGCATGAACAGATGTTTCATATG                             |
|              | Desulfovibrio vulgaris str. Miyazaki F                           | DvMF_2066                     | -89          | CATATGAACACGTGTTTCATATG                             |
| Dbac_0377    | Desulfomicrobium baculatum DSM 4028                              | Dbac_0377-Dbac_0375           | -45          | TTATCGTAATTCTACGATAT                                |
| Dbac_1936    | Desulfomicrobium baculatum DSM 4028                              | Dbac_1936-Dbac_1938           | -49          | CATATTAATATTTGTTTATATG                              |
| Ddes_1264    | Desulfovibrio desulfuricans subsp. desulfuricans str. ATCC 27774 | Ddes_1264-Ddes_1265           | -177<br>-128 | CATTTTCGTTCGCATGACGAAATA<br>TATTTTCGTCAAAGAACGAAATA |
| DESPIG_02495 | Desulfovibrio piger ATCC 29098                                   | DESPIG_02495-<br>DESPIG_02496 | -89          | TAAAACATAAAAACCTAGTTTTT                             |
|              |                                                                  |                               | -81          | TAAAACCTAGTTTTTTTAGTTGAC                            |
|              |                                                                  |                               | -55          | TGAAACTACTTTTTTTAGTTTGA                             |
| DMR_39480    | Desulfovibrio magneticus RS-1                                    | DMR_39490                     | -42          | TAATTCGAAAGATTTTCGAAATC                             |
|              |                                                                  | DMR_39480                     | -11          | TAGTTCGAAACATGTTCGAACAC                             |

**TABLE S4** Predicted binding sites of GntR family TFs. <sup>a</sup>Positions relative to the start of translation

| Regulon                                                          | Genome                                                           | Operon                                                           | Distance              | Site                                                        |
|------------------------------------------------------------------|------------------------------------------------------------------|------------------------------------------------------------------|-----------------------|-------------------------------------------------------------|
| Dde_1162                                                         | Desulfovibrio desulfuricans subsp. desulfuricans str. ATCC 27774 | Dde_1162                                                         | -119                  | ATTGAACAGGGACAGTTTTAT                                       |
|                                                                  |                                                                  | Dde_1163                                                         | -74                   | ATAAAACTGTCCCTGTTCAAT                                       |
| Desal_0038                                                       | Desulfovibrio salexigens DSM 2638                                | Desal_0038-Desal_0037                                            | -88                   | ATACTGGTAGGACCAGTAG                                         |
| DVU0030                                                          | Desulfohalobium retbaense DSM 5692                               | Dret_1470-Dret_1469                                              | -372                  | TCGAAATTGTATCTGTCTCAG                                       |
|                                                                  |                                                                  | Dret_1471                                                        | -40                   | CTGAGACAGATACAATTTCGA                                       |
|                                                                  | Desulfomicrobium baculatum DSM 4028                              | Dbac_3053-Dbac_3055                                              | -64                   | CGCAAACGTATCTGTACCGC                                        |
|                                                                  |                                                                  | Dbac_3052                                                        | -536                  | GCGGTACAGATACAGTTTGCG                                       |
|                                                                  | Desulfovibrio alaskensis G20                                     | Dde_0158-Dde_0159                                                | -127<br>-109          | TAAAAACTGTATCTGTTCTGA<br>TGAAAATTGTATCTGTGTTTG              |
|                                                                  |                                                                  | Dde_0157                                                         | -62<br>-44            | CAAACACAGATACAATTTTCA<br>TCAGAACAGATACAGTTTTTA              |
|                                                                  | Desulfovibrio magneticus RS-1                                    | DMR_35550                                                        | -71                   | CCATCACAGACACAGTTTTCA                                       |
|                                                                  | Desulfovibrio salexigens DSM 2638                                | Desal_3216-Desal_3218                                            | -118<br>-93           | CTAAAACTGTTACGGTTCATA<br>TAAAATCTGTATCTGTACTGA              |
|                                                                  |                                                                  | Desal_3215                                                       | -64<br>-39            | TCAGTACAGATACAGATTTTA<br>TATGAACCGTAACAGTTTTAG              |
|                                                                  | Desulfovibrio vulgaris Hildenborough                             | DVU0031-DVU0032                                                  | -431                  | TAAAAACTGTATCTGTGCATCA                                      |
|                                                                  |                                                                  | DVU0030                                                          | -40                   | TGATGACAGATACAGTTTTTA                                       |
|                                                                  | Desulfovibrio vulgaris str. Miyazaki F                           | DvMF_2174-DvMF_2173                                              | -124                  | GTTTGACTGTATCTGTTTCAGG                                      |
| DvMF_2175                                                        |                                                                  | -196                                                             | CCTGAACAGATACAGTCAAAC |                                                             |
| DVU2644                                                          | Desulfovibrio alaskensis G20                                     | Dde_2582-Dde_2580                                                | -176<br>-64           | CGAATGTCGACATTTT<br>AAATTGTCGACAATCG                        |
|                                                                  |                                                                  | Desulfovibrio desulfuricans subsp. desulfuricans str. ATCC 27774 | Ddes_0339-Ddes_0340   | -137                                                        |
|                                                                  | Desulfovibrio piger ATCC 29098                                   | DESPIG_01491                                                     | -282<br>-204          | CGAATGTCGACATTTT<br>CGAATGTCGACATACT                        |
|                                                                  |                                                                  | DESPIG_01488-DESPIG_01486                                        | -127<br>-49           | AGTATGTCGACATTCG<br>AAAATGTCGACATTCG                        |
|                                                                  | Desulfovibrio salexigens DSM 2638                                | Desal_1393                                                       | -255                  | ATAATGTCGACATTTG                                            |
|                                                                  |                                                                  | Desal_1392-Desal_1391                                            | -101<br>-67           | GAGATGTCGACATATA<br>AAAATGTCGACATTAG                        |
|                                                                  | Desulfovibrio vulgaris Hildenborough                             | DVU2647-DVU2644                                                  | -42                   | AAAATGTCGACATTTA                                            |
|                                                                  | DVU2802                                                          | Desulfohalobium retbaense DSM 5692                               | Dret_0921-Dret_0914   | -108                                                        |
| Desulfomicrobium baculatum DSM 4028                              |                                                                  | Dbac_3146-Dbac_3150                                              | -140                  | TTTTGGTTCTACAAAA                                            |
| Desulfovibrio alaskensis G20                                     |                                                                  | Dde_1614-Dde_1617                                                | -17                   | AATTGGTGGGACCAGAG                                           |
| Desulfovibrio desulfuricans subsp. desulfuricans str. ATCC 27774 |                                                                  | Ddes_1719-Ddes_1723                                              | -142                  | CTTTGGTATGACCAGAA                                           |
| Desulfovibrio salexigens DSM 2638                                |                                                                  | Desal_0359-Desal_0352                                            | -286<br>-122<br>-17   | ATCTGGTCCAACCAGAC<br>ATCTGGTTGGACCAGTT<br>AACTGGTTGGACCAGAT |
|                                                                  |                                                                  | Desulfovibrio vulgaris Hildenborough                             | DVU2802-DVU2808       | -16                                                         |

|         |                                        |                       |                   |                    |
|---------|----------------------------------------|-----------------------|-------------------|--------------------|
| DVU2953 | Desulfomicrobium baculatum DSM 4028    | Dbac_0439             | -53               | ATAAGGGCCAATTTT    |
|         |                                        | Dbac_0438             | -72               | AAAATTGGCCCTTAT    |
|         | Desulfovibrio alaskensis G20           | Dde_0621              | 57                | ATAAGGGACACTTTT    |
|         |                                        | Dde_0622-Dde_0625     | -75               | AAAAGTGTCCCTTAT    |
|         | Desulfovibrio vulgaris Hildenborough   | DVU2953               | -269              | AAAAGGGGCACTTTT    |
|         |                                        | DVU2952               | -71               | AAAAGTGCCCTTTT     |
| LldR    | Desulfohalobium retbaense DSM 5692     | Dret_0156-Dret_0158   | -35               | CATTGGTAGGACCAATT  |
|         | Desulfomicrobium baculatum DSM 4028    | Dbac_1975-Dbac_1976   | -32               | TATTGGTAGGACCAATT  |
|         |                                        | Dbac_0552             | -70               | GATTGGTCCCTACCAATT |
|         |                                        | Dbac_2068             | -42               | TATTGGTAGGACCAATT  |
|         | Desulfovibrio alaskensis G20           | Dde_1244-Dde_1245     | -31               | AAGTGGTCAGACCAATT  |
|         | Desulfovibrio salexigens DSM 2638      | Desal_1467-Desal_1465 | -47               | TATCGGTCAGACCAATT  |
|         |                                        |                       | -17               | AATTGGTAGGACCCATT  |
|         | Desulfovibrio vulgaris Hildenborough   | DVU2785-DVU2783       | -65               | GATTGGTACAACCAATT  |
|         |                                        |                       | -49               | TATTGGTTGGACCAATC  |
|         | Desulfovibrio vulgaris str. Miyazaki F | DvMF_1205-DvMF_1203   | -77               | AATTGGTTCAACCAGTG  |
| -61     |                                        |                       | GAGTGGTTGTACCAATT |                    |
| PhnF    | Desulfomicrobium baculatum DSM 4028    | Dbac_0812             | -79               | ATTTGTATAGACATCT   |
|         |                                        | Dbac_0813-Dbac_0821   | -39               | AGATGTCTATACAAAT   |
|         |                                        | Dbac_0829-Dbac_0826   | -93               | AGTTGTCTAGACCACT   |
|         | Desulfovibrio alaskensis G20           | Dde_3327              | -112              | GGTTGTCTAGATAACT   |
|         |                                        | Dde_3328-Dde_3336     | -40               | AGTTATCTAGACAACC   |
|         |                                        |                       |                   |                    |

## Supplementary text. Detailed description of the reconstructed reference and singleton TF regulons

### Crp/Fnr family regulons

Members of the Crp/Fnr family of TFs are involved in control of several functions such as respiration, nitrogen fixation, degradation of aromatic compounds, photosynthesis, and virulence. We constructed the neighbor-joining phylogenetic tree for 34 proteins from the Crp/Fnr family of TFs in *Desulfovibrionales* (Fig. 2). As a result, 24 regulatory proteins were clustered into five reference groups of three or more proteins, whereas the remaining 10 proteins formed singletons (Table 1). We reconstructed reference regulons for the Crp/Fnr family by applying a comparative genomics approach to each of the identified five groups of TFs. Then we used TF binding motifs and functional roles of the reference regulons to infer regulons for singleton TFs. Overall, well-conserved and singleton TFs of the Crp/Fnr family in *Desulfovibrionales* can be classified into three large groups, MreC-like, HcpR-like, and CoxA-like. The group of MreC-like proteins includes three MreC orthologs and five singleton TFs. The transcription regulator MreC was previously experimentally described in *D. alaskensis* G20 as a putative activator of the *mre* operon that is involved in the metabolic process of uranium (VI) and chromate reduction (9). MreC orthologs are present in the three genomes, *D. alaskensis* G20, *D. salexigens*, and *D. vulgaris* str. Hildenborough. In all three genomes, the *mreC* regulatory gene is a third gene in the *mre* operon that is a likely target of MreC-dependent regulation (Fig. S1). Analysis of the *mreA* upstream region identified a candidate 18-bp MreC binding motif with the consensus sequence CnGTwGCAnnTGCwACnG. Subsequent genome scanning with this sequence motif did not reveal any additional conserved TFBSs, thus we concluded that MreC is a local regulator of the *mre* operon. The MreC regulon has a potential functional role in metal reduction since the *mreG* gene encodes a NADPH-dependent U(VI)- and Cr(VI)-reducing oxidoreductase, which is involved in the cytoplasmic heavy metal reduction in *D. alaskensis* (9). Other MreC-regulated genes from the *mre* operon are hypothetical NhaC-family transporter *mreA*, putative arylsulfatase *mreB*, thioredoxin *mreD*, and thioredoxin reductase *mreE*.

Five MreC-like proteins were classified as singleton TFs (Fig. S1). Analysis of the genomic context of two singleton TFs, Dde\_1200 and Desal\_0411, revealed that they are located within two operons containing gene sets that partially overlap with the reconstructed MreC reference regulon. These operons include homologs of *mreB*, *mreD*, and *mreE* genes from MreC regulon, thus suggesting a potential duplication of the *mre* operon in the common ancestor of *D. alaskensis* and *D. salexigens*. However, these operons lack homolog of NhaC-family transporter MreA which is substituted by a putative transporter from the sodium:sulphate transporter family. In upstream regions of both operons, we found an 18-bp pseudopalindromic motif, which is partially similar to a motif of the MreC reference regulon (Fig. S1).

The third MreC-like singleton TF DVU3111 is encoded in a unique genomic locus that also includes a paralog of the *mreA* transporter, a ferredoxin, and a hypothetical oxidoreductase. As the reference MreC regulon also includes a similar *mreA* gene, we built the training set for identification of a putative DVU3111-binding motif by combining the upstream gene regions of *DVU3111*, *DVU3110* and *DVU3108/mreA* genes. A common 18-bp DNA motif identified in this training set demonstrated significant similarity with the consensus motifs of other reconstructed regulons from the MreC subfamily.

The phylogenetic and genome context analysis of the last two MreC-like singleton TFs, Ddes\_2092 and Ddes\_1411, suggests that these regulators are close paralogs that both are adjacent to genes encoding hypothetical arylsulfotransferases. These two paralogous loci contain different transporter genes: *Ddes\_2092* is co-localized with a transporter from the sodium/sulfate family, whereas *Ddes\_1411* is co-localized with an MFS-type transporter. The identified 18-bp binding motif for the Ddes\_2092 and Ddes\_1411 singleton TFs has the consensus sequence wTGTTGCnnnnGCAACA w which is similar to the MreC binding motif.

In summary, the detailed analysis of MreC-like regulators demonstrates general applicability of the novel approach for the inference of local singleton regulons. The results suggest that the set of functional roles of genes controlled by the reference TF regulons can be iteratively enriched by func-

tional roles of genes from the analyzed singleton TF regulons and that this expanding set can be efficiently used for reconstruction of other singleton TF regulons.

A group of HcpR-like proteins from the Crp/Fnr family in the *Desulfovibrionales* includes 13 regulators, ten of which form two orthologous groups, whereas the remaining three regulators were classified as singleton TFs.

The HcpR regulon has been previously studied by comparative genomics in *D. vulgaris* and *D. alaskensis* and was predicted to include multiple genes involved in the nitrogen oxide and sulfate reduction (15). In this work, the detailed reconstruction of HcpR regulon in seven *Desulfovibrionales* genomes allowed us to revise both the HcpR-binding motif and the regulon content (Fig. S2). The revised motif associated with the reference HcpR regulon in *Desulfovibrionales* is an 18-bp pseudopalindrome with the consensus sequence nttTGACnnnnGCAaag. We compared the predicted contents of HcpR regulons reconstructed in this study and in our previous work (15). First, we confirmed that in all analyzed genomes the HcpR regulon includes the nitrosative stress response genes *hcp-frdX* encoding a hydroxylamine reductase Hcp and a ferredoxin-like protein FrdX, as well as the *DVU1080-DVU1081* operon encoding a hypothetical oxidoreductase and a membrane-bound polyferredoxin. Second, we found that the sulfate reduction genes *apsAB* and *sat* are not members of the HcpR regulon but they do belong to a global regulon controlled by the NADH-responsive transcription regulator Rex. Putative HcpR-binding sites previously identified in upstream regions of these genes are Rex-binding sites conserved in the nine *Desulfovibrionales* genomes including two bacteria, *D. piger* and *D. desulfuricans*, that lack HcpR protein (12). Third, the revised HcpR regulon was expanded to include a hypothetical transmembrane protein (DVU3251 in *D. vulgaris* str. Hildenborough and its orthologs in three genomes), a hypothetical cupin domain-containing protein (Dde\_2303 in *D. alaskensis* and its orthologs in two genomes), and the nitrite reductase NrfHA in *D. salexigens* that has an important role in nitrosative stress response (6).

The second orthologous group of regulators within the HcpR subfamily is represented by the three proteins, Desal\_2066, Dret\_1643, and DMR\_38640. Genomic context analysis of these *hcpR*-like genes did not identify conservatively co-localized genes but we identified a common

pseudopalindromic motif upstream of all three genes, which was similar to the HcpR binding motif in six positions (Fig. S2). A whole-genome search with this motif identified candidate binding sites located upstream of genes encoding a hypothetical FAD-dependent pyridine nucleotide-disulphide oxidoreductase in *D. salexigens* and *D. retbaense* but not in *D. magneticus*. We hypothesized that the DMR\_38640 regulator in *D. magneticus* regulates the divergent *DMR\_38640* and *DMR\_38630-DMR\_38620* operons by binding to a candidate site located in their common upstream region. Thus, the novel HcpR-like regulon has two target operons per genome including autoregulated *hcpR*-like genes and putative oxidoreductases that could be involved in the nitrosative stress.

Phylogenetic tree of Crp/Fnr proteins contains three HcpR-like singleton TFs, Ddes\_0528, DESPIG\_03026, and Ddes\_1827. The latter two regulatory genes are co-transcribed with *hcp* genes encoding hydroxylamine reductases (Fig. S2). Analysis of upstream regions of all three these operons identified an 18-bp palindromic TFBSs that have some similarity to HcpR binding motif. An additional member Ddes\_0528 singleton regulon in *D. desulfuricans* (*Ddes\_1164*) encodes a hypothetical cupin domain-containing protein, which is orthologous to the previously identified member of the reference HcpR regulon. We concluded that the reference HcpR regulon and three HcpR-like singleton regulons in *Desulfovibrionales* have a similar functional role in the control of nitrosative stress response genes.

CooA-like regulators are represented by 11 TFs that are divided into two orthologous groups. The first group of regulators includes orthologs of the carbon monoxide-responsive regulator CooA from *Rhodospirillum rubrum* (17). In our previous analysis of two *Desulfovibrio* genomes (14), the predicted CooA regulon has included the carbon monoxide dehydrogenase (CODH) operon *cooSC* in both species and the CODH-associated hydrogenase operon *cooMKLXUHXF* in *D. vulgaris* (14). In the present study, CooA orthologs were identified in eight *Desulfovibrionales* genomes (all except *D. piger* and *L. intracellularis*). In all these genomes, we found the *cooA* gene to be adjacent to the *cooSC* operon that is preceded by a conserved CooA-binding site. We used these candidate sites from all seven *Desulfovibrionales* genomes to build a common CooA binding site motif with the nTGTCGGnnnnCCGACAn consensus, and then scanned the analyzed genomes for its presence. However, no additional CooA binding

sites have been identified in *Desulfovibrionales*, suggesting that CooA is a local regulator for the *cooSC* operon. Our comparative analysis did not confirm a putative CooA site that has been predicted upstream of the *cooMKLXUHXF* operon in *D. vulgaris*. First, this putative site has three substitutions in conserved positions of the revised CooA binding motif. Second, it is not conserved in other three *Desulfovibrionales* genomes that have orthologs of the *cooMKLXUHXF* operon.

The second orthologous group of CooA-like proteins includes three TFs, DvMF\_1708 from *D. vulgaris* str. *Miyazaki F*, DMR\_29690 from *D. magneticus*, and DESPIG\_02293 from *D. piger*. A genomic context analysis of these CooA-like regulatory genes revealed that they are co-transcribed with genes encoding a hypothetical oxidoreductase and a ferredoxin that are similar to the subunits of adenylylsulfate reductase (Fig. S3). These operons in *D. piger* and *D. magneticus* also include an upstream gene encoding a hypothetical CitT-like transporter, whereas the operon in *D. vulgaris* str. *Miyazaki F* includes transporter from the COG0730 family. A novel 18-bp pseudopalindromic motif was identified upstream of all three operons (Fig. S3). This motif is partially similar to the CooA binding motif, suggesting that it is a candidate binding motif of the CooA-like regulator. No other candidate binding sites were found with this motif in the three genomes, suggesting that DvMF\_1708 and its orthologs are the local regulators of adjacent genes that may be linked to utilization of a yet undefined sulfate derivative.

Two singleton TFs in *D. salexigens*, Desal\_0494 and Desal\_3734, were not assigned to any of the above three Crp/Fnr family sub-groups. A candidate TFBS for the Desal\_0494 singleton TF was identified in the upstream region of the downstream *Desal\_0493* gene encoding a GlnB-like protein.

In conclusion, the five the Crp/Fnr family reference TF regulons in the *Desulfovibrionales* reconstructed in this work share several common features. First, these regulons use local regulators that were predicted to control from one to three target operons per genome. Second, the candidate binding motifs of the analyzed Crp/Fnr family regulators have the same 18-bp length and a common pair of nucleotides (thymine and adenosine in positions 4 and 15, respectively) that are also conserved in binding motifs of previously characterized regulators from the Crp/Fnr family, such as



Crp, Fnr, Dnr, ArcR, and NtcA (10, Table S2). Third, each of these regulons includes at least one gene encoding an oxidoreductase, suggesting that all Crp/Fnr-family TFs in *Desulfovibrionales* can potentially respond to redox-active substances, such as nitric oxide for HcpR (15) and carbon monoxide for CoxA (17).

### **ArsR family regulons**

A prototypical regulator from the ArsR family is the plasmid-encoded regulator ArsR that controls arsenical resistance operon from *E. coli* (16).

Many ArsR family proteins are metal-sensing transcriptional repressors (reviewed in (11)) but some regulators of this family do not possess metal-binding domains and regulate other cellular functions. The only characterized member of this TF family in *Desulfovibrionales* is the ArsR protein from *D. alaskensis* G20, a regulator of an arsenic resistance *arsRBCC* operon (8).

Phylogenetic analysis of 38 ArsR family proteins from nine *Desulfovibrionales* genomes revealed four reference groups including 30 TFs and eight singleton TFs (Fig. 3). A comparative genomics approach was applied to each of reference groups, and four reference regulons were reconstructed as a result. Then, the obtained TF-binding motifs of reference regulons were used to characterize singletons.

**SahR, a new regulator of S-adenosylhomocysteine metabolism.** One of the ArsR family TFs, DVU0606, and its orthologs in other *Desulfovibrionales* genomes were found in a conserved operon with the adenosylhomocysteinase gene *ahcY*. We identified a conserved 20-nt motif upstream of the *DVU0606-ahcY* operons and proposed that this motif is a binding site of the DVU0606 regulator that was named the S-AdenosylHomocysteine Regulator SahR. Whole genome scanning with this motif identified additional conserved SahR binding sites upstream of genes involved in S-adenosylhomocysteine and methionine metabolism: *metE* (5-methyltetrahydropteroyltriglutamate homocysteine S-methyltransferase), *metF* (5,10-methylenetetrahydrofolate reductase), and *metK* (S-adenosylmethionine synthetase) (Fig. S4). Additional non-conserved SahR binding sites were also found upstream of the methionine transporter gene *metT* in *D. alaskensis* G20 and the homocysteine S-methyltransferase *bhmT* in *D. ret- baensae*. Experimental validation of the predicted novel regulon for methionine metabolism in *Desulfovibrionales* is currently under way.

**Metal detoxification SmtB regulon.** The second reference group of ArsR family regulators present in six *Desulfovibrionales* genomes is similar to metal-sensing SmtB protein regulating metallothionein or zinc exporter in cyanobacteria (5, 18). Three of six SmtB-like regulatory genes in *Desulfovibrionales* constitute putative operons with genes encoding permeases, while other three genes are transcribed monocistronically (Fig. S5). A common palindromic motif identified upstream of all three dicistronic operons coincides with the known SmtB binding motif (2). In other three genomes, candidate TFBSs were identified by whole-genome scanning with three SmtB binding sites as a training set.

In *D. vulgaris* str. Miyazaki and *D. retbaensae*, the SmtB TFs regulate cation transport ATPases similar to a zinc exporter protein controlled by SmtB in *Synechocystis* PCC 6803 (18). In other four genomes, SmtB TFs regulate genes encoding predicted permeases from DUF318 family probably involved in an efflux of heavy metal cations.

**Arsenic resistance ArsR regulon.** Two reference TF groups of ArsR family regulators are chromosomally coupled to arsenic resistance genes and are orthologous similar to the previously described ArsR regulator from *D. alaskensis* G20 (8). For identification purposes, we designated the bigger group of TFs as ArsR, and the smaller group as ArsR2. A phylogenetic analysis clearly distinguished these two clades on the phylogenetic tree (Fig. 3). The reconstructed binding motifs of ArsR and ArsR2 regulators are quite similar, thus we cannot exclude a cross-binding between these regulators to heterologous sites in organisms containing both regulators. The reconstructed ArsR regulons contain between two and six genes per genome, and in most cases include the autoregulated *arsR* genes (Fig. S6). ArsR regulons often include genes encoding predicted permeases of DUF318 family and putative glutaredoxins. The ArsR2 regulons are more variable and may include arsenite efflux permeases, arsenate reductases and thioredoxin and thiol-disulphide interchange-like proteins. We conclude that the *Desulfovibrionales* species use different mechanisms for the arsenic resistance which are regulated by similar ArsR family TFs.

**ArsR family singletons.** Eight ArsR family proteins from the *Desulfovibrionales* genomes were classified as singleton TFs by the phylogenetic analysis. All ArsR family reference TF binding motifs have common motif structure (20 or 22 bp long with a palindromic repeat), so similar binding motifs were anticipated for ArsR family singleton TFs.

Two orthologous regulatory genes of ArsR family were found near operons encoding arsenic resistance genes, namely the *DvMF\_2391-2390* operon encoding arsenite metallochaperone ArsD and arsenite-transporting ATPase ArsA and the *Ddes\_1926* gene encoding SAM-dependent arsenic methyltransferase. A common binding motif was identified upstream of these two operons and regulatory genes (Fig. S6). There is no membrane protein associated with the ArsA ATPase in the *DvMF\_2392* regulon, but ArsR regulon in the same genome include *arsP* gene, and in other bacterial species ArsP protein was found to be associated with ArsA-ArsD transporting system (3). Another singleton regulator, *Ddes\_1264*, is cotranscribed with a gene encoding a P-type ATPase, similar to transporters from *SmtB* regulon. Two similar strong 22-bp palindromes was identified upstream of the operon.

For reconstruction of other singletons of ArsR family, we looked for strong 22-bp palindromic repeats upstream of singleton regulatory genes that are similar to known TF binding motifs. Single candidate TFBSs sites were found upstream of other ArsR family singleton TFs, *DMR\_39480*, *Dbac\_0377* and *Dbac\_1936*. Three nearly identical 22-bp palindromes were found upstream of bicistronic operon encoding singleton TF *DESPIG\_02495* and a fusion protein of acyl-CoA synthase and MFS transporter.

Three ArsR family singleton TFs were predicted to control arsenic or heavy metal resistance, but the roles of other five singletons are unclear. *DESPIG\_02495* regulates a long fusion protein containing an acyl-CoA transferase domain that may be involved in secondary metabolism. *Dbac\_0377* is predicted to regulate a thioredoxin and an acetyl-CoA synthase-like enzyme that may participate in methyltransfer reactions. Other singleton regulons contain either enzymes of unknown specificity (hydrolase and FMN reductase) or hypothetical proteins.

In summary, the study of ArsR family regulons and singletons demonstrated how novel reconstructed motifs can be used in subsequent rounds of reconstruction, implicating operon predictions and functional annotation information where possible. Prevalence of autoregulated compact local regulons and preservation of binding motif features throughout the family helped us to reconstruct ArsR family regulatory systems in *Desulfovibrionales* genomes (Table S4).

### **GntR family regulons**

We identified fifty three members of the GntR TF family in ten *Desulfovibrionales* genomes. Phylogenetic tree of GntR TFs from the *Desulfovibrionales* containing also the known representatives of all GntR subfamilies (13) was constructed, and distinct branches corresponding to different subfamilies were identified with high bootstrap values (data not shown). Twenty six, six and fifteen GntR family proteins were assigned to the FadR, HutC and MocR subfamilies, respectively (Fig. 4). Six proteins forming a distinct clade on the tree were not assigned to any known subfamily and may represent a new GntR subfamily.

**FadR subfamily regulons.** Almost a half of GntR family regulators in the *Desulfovibrionales* belong to the FadR subfamily. A phylogenetic analysis of this subfamily identified two reference regulons with five and six regulators, and fifteen singleton TFs. Reference regulons from FadR subfamily were predicted to regulate lactate metabolism and amino acid metabolism.

FadR subfamily members from one of the most conserved groups (DVU2785) are homologs of proteobacterial LldR regulator of lactate metabolism (1), so this reference regulon was designated LldR. In *Desulfovibrionales*, this local regulon typically consists of three genes, *lldR* (regulator), *lldD* (lactate dehydrogenase) and *lldX* (putative lactate transport protein), that are co-transcribed in most genomes. LldR binding sites were identified upstream of these operons in five of six genomes. In *D. baculatum*, an additional LldR binding site was found upstream of the *glcB* gene encoding malate synthase. In *D. alaskensis* G20 genome, a *lldR* paralog, *Dde\_1244*, was identified that is co-transcribed with a gene encoding a lactate transporter paralog, *Dde\_1245*. Surprisingly, in this genome LldR binding site was identified upstream of a *Dde\_1244-Dde\_1245* operon but not up-

stream of a *lldRDX* operon. LldX is a membrane protein homologous to TSUP family transporters (4-Toluene Sulfonate Uptake Permease). This protein is not related to LldP lactate transporters that are regulated by LldR in gamma- and beta-Proteobacteria. Cotranscription and coregulation of the *lldX* gene with *lldD* gene encoding lactate dehydrogenase suggests that main LldX function is a transport of lactate.

Another FadR subfamily gene, DVU2644, is co-transcribed with three other genes that are probably involved in amino acid metabolism. The first gene, DVU2647, annotated as endoribonuclease L-PSP, encodes a homolog of the YjgF protein which was recently shown to inhibit phosphoribosylamine synthesis in *Salmonella* (7). The second gene, DVU2646, encodes putative 1-aminocyclopropane-1-carboxylate deaminase, and we propose that the first gene may be an inhibitor of this enzyme. The third gene encodes transport protein homologous to Na<sup>+</sup>/H<sup>+</sup> antiporters, and some transporters from this family are capable to transport amino acid. These three genes are regulated by DVU2644 and its orthologs in all five *Desulfovibrionales* genomes. DVU2644 TF appears to be functionally linked with amino acid metabolism, but the exact function of this regulon is unknown.

Reconstructed binding motifs of LldR and DVU2644 proteins are not similar to each other, with different length and sequence. To identify potential singleton binding sites, we used these two binding motifs for a site search with a relaxed threshold in upstream regions of all singleton regulatory genes from the FadR subfamily. Potential binding sites slightly similar to the LldR binding motif were found upstream of two regulatory genes, *Desal\_0038* and *Dbac\_2821*, but not upstream of any other FadR subfamily gene. *Desal\_0038* protein from FadR subfamily probably regulates an autoregulated operon encoding transcriptional regulator and glycerate kinase. We cannot also exclude the possibility of regulation of a divergently transcribed gene encoding methyl-accepting chemotaxis sensory transducer by *Desal\_0038*. The singleton TF *Dbac\_2821* regulates an operon containing this regulator and a choline dehydrogenase, a betaine aldehyde dehydrogenase and a substrate-binding subunit of a glycine betaine transporter.

**MocR subfamily regulons.** Characteristic feature of the MocR subfamily is a presence of a long C-terminal domain similar to a pyridoxal phosphate-dependent transferase that probably has no enzymatic activity but required for ligand sensing. Two reference TF groups, DVU0030 and DVU2953, (found in seven and three genomes, respectively) and five singleton TFs were identified in this subfamily by phylogenetic analysis. TF binding motifs for reference regulators were identified by search for conserved motifs in upstream regions of regulatory genes. Both reference regulons control transport proteins possibly involved in amino acid metabolism. DVU0030 regulon contains a two-gene operon located divergently from the regulatory gene in each genome (Fig. S8). This operon encodes two putative amino acid transport proteins, but in *D. baculatum* an additional gene in the operon, *Dbac\_3055*, encodes a putative aminotransferase. An autoregulation of a gene encoding the regulatory protein cannot be ruled out. So, the most probable function of this regulon is transport of unidentified amino acid or similar substance. The second MocR subfamily reference regulon, DVU2953, probably consists of the regulatory gene and a divergent gene encoding DMT family permease (Fig. S8). In *D. alaskensis* G20, the permease gene is disrupted by insertion of transposon. The function of this regulon may be linked with amino acid transport because DMT transporters have been shown to transport different amino acids in *E. coli*. Another possible function of this transport protein is drug resistance. A candidate TFBS for the MocR subfamily singleton TF *Ddes\_1162* was identified upstream of the divergent *Ddes\_1162* and *Ddes\_1163* genes, the latter encoding a pyridoxamine 5'-phosphate oxidase-like protein.

**HutC subfamily singletons.** Six HutC-subfamily regulatory proteins were identified in the *Desulfovibrionales* genomes, and all of them were classified as singleton TFs by phylogenetic analysis. Two genes encoding similar HutC subfamily regulators, *Dde\_3327* and *Dbac\_0812*, are adjacent to the two phosphonate metabolism operons. The PhnF regulator from the HutC subfamily has been shown to regulate the phosphonate metabolism operon in *Mycobacterium smegmatis* (4). Since no reference regulon was found in *Desulfovibrionales*, a PhnF binding motif from *M. smegmatis* was used for a singleton reconstruction. Binding sites weakly similar to PhnF were predicted upstream of both operons and upstream of a phosphonate transport operon in *D. baculatum* (Fig. S8). Search for similar sites upstream of other regulatory genes from HutC subfamily was unsuccessful.

**DVU2802 regulator may represent a new subfamily within GntR family.** Comparative genomics reconstruction of the DVU2802 regulon allowed us to find a candidate TFBSs upstream of only one operon in each genome (Fig. S9). In all six *Desulfovibrionales* genomes that contain DVU2802 orthologs, the first gene of a regulated operon encodes ortholog of DVU2802 TF. Other gene of this regulon, DVU2804, encodes secreted hydrolase from metallo-beta-lactamase family. Another members of the regulon probably participate in maturation (DVU2805) and transport (DVU2806-DVU2807) of the hydrolase protein outside of the cell. Gene content of the regulon varies between genomes, since three of six regulons lack genes encoding the transport system. A function of the regulon is probably determined by the specificity of secreted hydrolase DVU2804 which is unknown yet.

It should be noted that the GntR family analysis revealed a significant diversity of TF binding motifs throughout the family. In contrast to non-conserved regulators from the Crp/Fnr and ArsR families, only nine of thirty one GntR family singleton regulons were successfully reconstructed (Table S3). No common features such as a motif length, parity or conservation of distinct position were preserved at a family level, hampering prediction of binding motifs for non-conserved regulators. All reconstructed GntR family regulons are local and compact, with typically one or two binding sites per genome. Amino acid metabolism and transport are the most common functions for many members of GntR family regulons, but other metabolic functions may be regulated by GntR family members as well.

## References

1. **Aguilera L, Campos E, Giménez R, Badía J, Aguilar J, Baldoma L.** 2008. Dual role of LldR in regulation of the *lldPRD* operon, involved in L-lactate metabolism in *Escherichia coli*. *J. Bacteriol.* **190**:2997-3005.
2. **Bose M, Slick D, Sarto MJ, Murphy P, Roberts D, Roberts J, Barber RD.** 2006. Identification of SmtB/ArsR cis elements and proteins in archaea using the Prokaryotic InterGenic Exploration Database (PIGED). *Archaea.* **2**:39-49.
3. **Castillo R, Saier MH Jr.** 2010. Functional Promiscuity of Homologues of the Bacterial ArsA ATPases. *Int. J. Microbiol.* **2010**:187373.

4. **Gebhard S, Cook GM.** 2008. Differential regulation of high-affinity phosphate transport systems of *Mycobacterium smegmatis*: identification of PhnF, a repressor of the *phnDCE* operon. *J. Bacteriol.* **190**:1335-1343.
5. **Huckle JW, Morby AP, Turner JS, Robinson NJ.** 1993. Isolation of a prokaryotic metallothionein locus and analysis of transcriptional control by trace metal ions. *Mol. Microbiol.* **7**:177-187.
6. **Kern M, Volz J, Simon J.** 2011. The oxidative and nitrosative stress defence network of *Wolinella succinogenes*: cytochrome c nitrite reductase mediates the stress response to nitrite, nitric oxide, hydroxylamine and hydrogen peroxide. *Environ. Microbiol.* **13**:2478-2494.
7. **Lambrecht JA, Browne BA, Downs DM.** 2010. Members of the YjgF/YER057c/UK114 family of proteins inhibit phosphoribosylamine synthesis in vitro. *J. Biol. Chem.* **285**:34401-34407.
8. **Li X, Krumholz LR.** 2007. Regulation of arsenate resistance in *Desulfovibrio desulfuricans* G20 by an *arsRBCC* operon and an *arsC* gene. *J. Bacteriol.* **189**:3705-3711.
9. **Li X, Krumholz LR.** 2009. Thioredoxin is involved in U(VI) and Cr(VI) reduction in *Desulfovibrio desulfuricans* G20. *J. Bacteriol.* **191**:4924-4933.
10. **Novichkov PS, Laikova ON, Novichkova ES, Gelfand MS, Arkin AP, Dubchak I, Rodionov DA.** 2010. RegPrecise: a database of curated genomic inferences of transcriptional regulatory interactions in prokaryotes. *Nucleic Acids Res.* **38**(suppl 1):D111-D118.
11. **Osman D, Cavet JS.** 2010. Bacterial metal-sensing proteins exemplified by ArsR-SmtB family repressors. *Nat. Prod. Rep.* **27**:668-680.
12. **Ravcheev DA, Li X, Latif H, Zengler K, Leyn SA, Korostelev YD, Kazakov AE, Novichkov PS, Osterman AL, Rodionov DA.** 2012. Transcriptional regulation of central carbon and energy metabolism in bacteria by redox-responsive repressor Rex. *J. Bacteriol.* **194**:1145-1157.
13. **Rigali S, Derouaux A, Giannotta F, Dusart J.** 2002. Subdivision of the helix-turn-helix GntR family of bacterial regulators in the FadR, HutC, MocR, and YtrA subfamilies. *J. Biol. Chem.* **277**:12507-12515.



14. **Rodionov DA, Dubchak I, Arkin A, Alm E, Gelfand MS.** 2004. Reconstruction of regulatory and metabolic pathways in metal-reducing delta-proteobacteria. *Genome Biol.* **5**:R90.
15. **Rodionov DA, Dubchak IL, Arkin AP, Alm EJ, Gelfand MS.** 2005. Dissimilatory metabolism of nitrogen oxides in bacteria: comparative reconstruction of transcriptional networks. *PLoS Comput. Biol.* **1**:e55.
16. **San Francisco MJ, Hope CL, Owolabi JB, Tisa LS, Rosen BP.** 1990. Identification of the metalloregulatory element of the plasmid-encoded arsenical resistance operon. *Nucleic Acids Res.* **18**:619-624.
17. **Shelver D, Kerby RL, He Y, Roberts GP.** 1995. Carbon monoxide-induced activation of gene expression in *Rhodospirillum rubrum* requires the product of *cooA*, a member of the cyclic AMP receptor protein family of transcriptional regulators. *J. Bacteriol.* **177**:2157-2163.
18. **Thelwell C, Robinson NJ, Turner-Cavet JS.** 1998. An SmtB-like repressor from *Synechocystis* PCC 6803 regulates a zinc exporter. *Proc. Natl. Acad. Sci. U. S. A.* **95**:10728-10733.
